# Supplementary material for: Observation of quasi-planar boron carbonyl complexes B 36 (CO) n + ( n = 1–6) analogous to coronene monocation C 24 H 12 +
Source: Royal Society of Chemistry journal article supplement (doi:10.1039/d5cp04719f), 2026-01-01
Supplement: d5cp04719f1.pdf [file d5cp04719f1.pdf]

## Observation of quasi-planar boron carbonyl complexes

### $B_{36}(CO)_n^+$ ( $n = 1-6$ ) analogous to coronene monocation $C_{24}H_{12}^+$

#### Table of Contents

**Fig.S1** Low-lying isomers of  $B_{36}^+$ .

**Fig.S2-S6** Low-lying isomers of  $B_{36}(CO)_n^+$  ( $n = 1-7$ ) and  $B_{36}(CO)_n$  ( $n = 1-6$ ).

**Fig.S7-S19** Relaxed potential-energy curves for the approach of CO toward  $B_{36}(CO)_n^+$  ( $n = 0-7$ ) and  $B_{36}(CO)_n$  ( $n = 0-6$ ).

**Fig.S20-S25** AdNDP bonding patterns analyses of  $B_{36}(CO)_n^+$  ( $n = 1-6$ ) and  $B_{36}(CO)_n$  ( $n = 1-6$ ).

**Fig.S26-S29** Enlarged ICSS surfaces and GIMIC plots of  $B_{36}(CO)_n^+$  ( $n = 0-6$ ), compared with that of neutral  $B_{36}$ .

**Fig.S30** Calculated EDA-NOCV of  $Fe(CO)_5$ .

**Table S1-S3** EDA-NOCV analyses of  $B_{36}CO^+$ ,  $B_{36}CO$  and  $Fe(CO)_5$ .

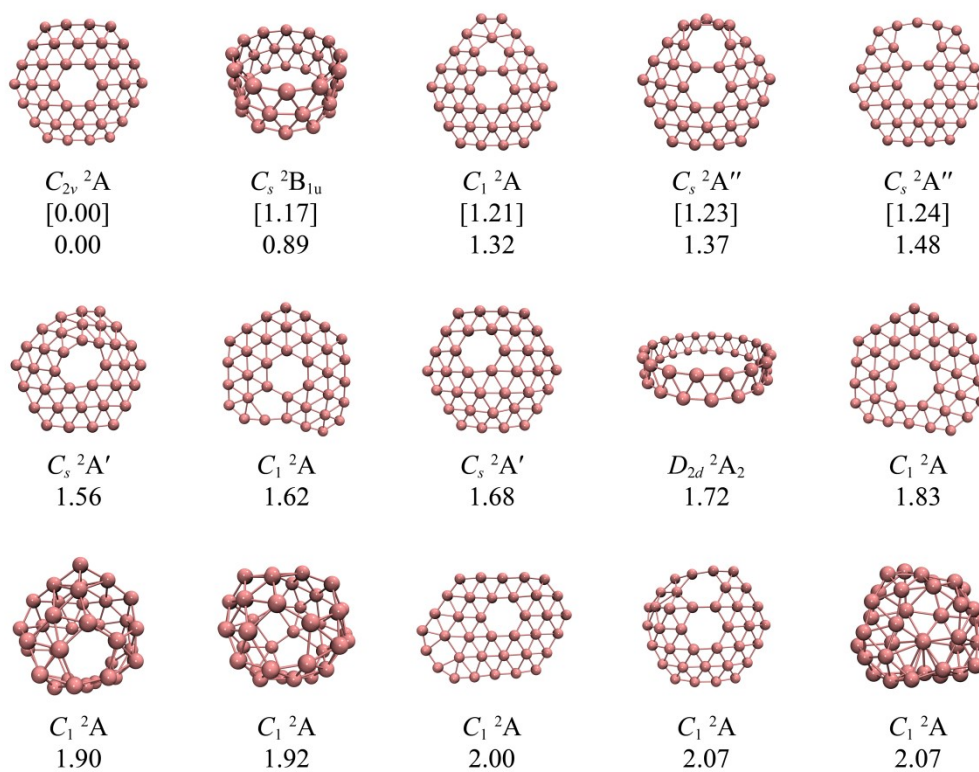

**Fig.S1** Optimized low-lying isomers of  $B_{36}^+$ , with the relative energies indicated in eV at DLPNO-CCSD(T)/def2-svp in square brackets and PBE0/6-311+G(d).

(a)  $n = 1$

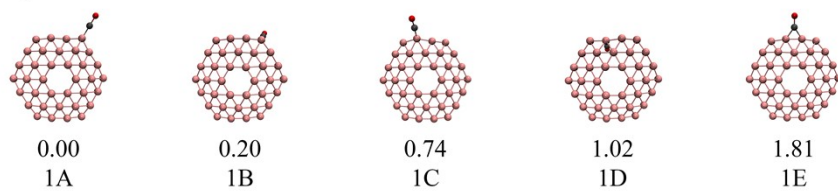

(b)  $n = 2$

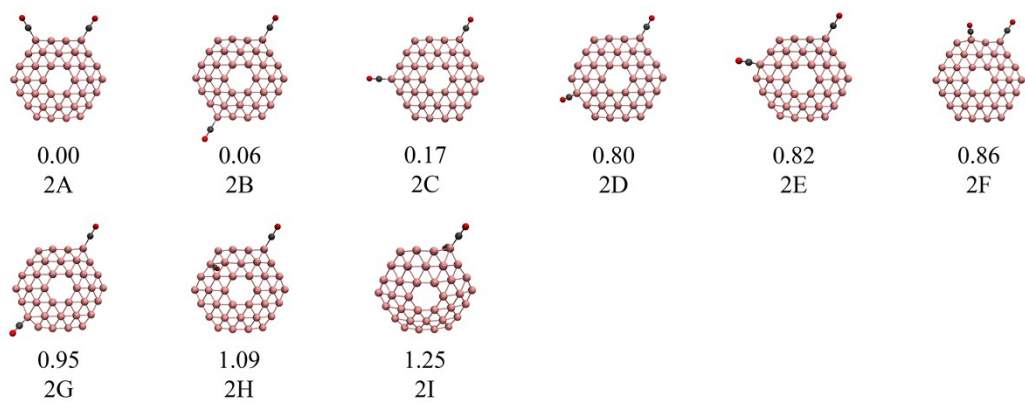

(c)  $n = 3$

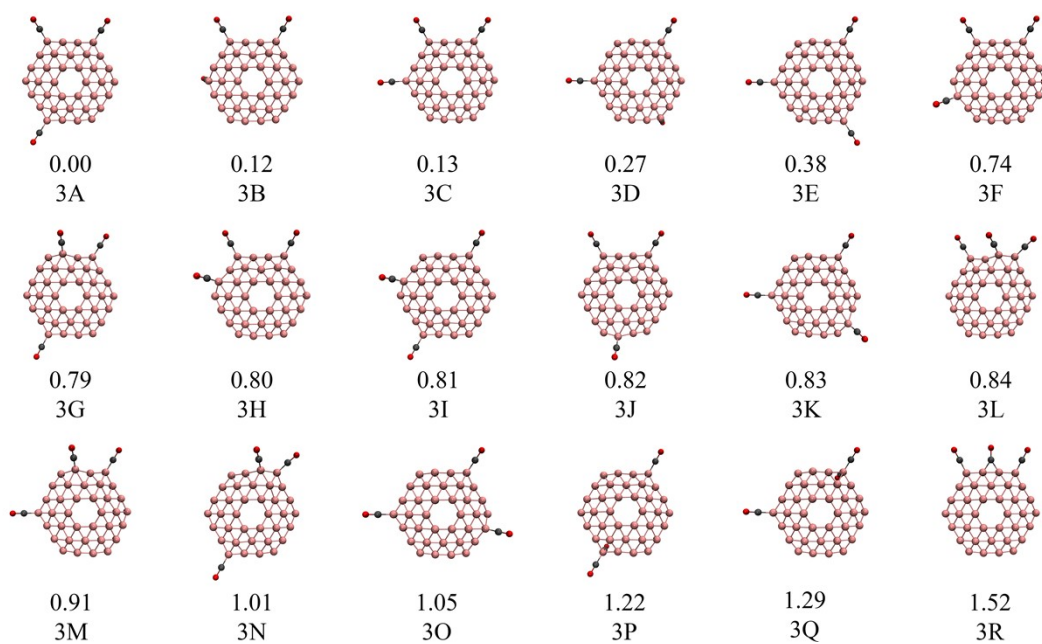

**Fig.S2** Optimized low-lying isomers of  $B_{36}(CO)_n^+$  ( $n = 1-3$ ) at PBE0-D3/6-311+G(d) level, with the relative energies ( $\Delta E$ ) indicated in eV.

(a)  $n = 4$

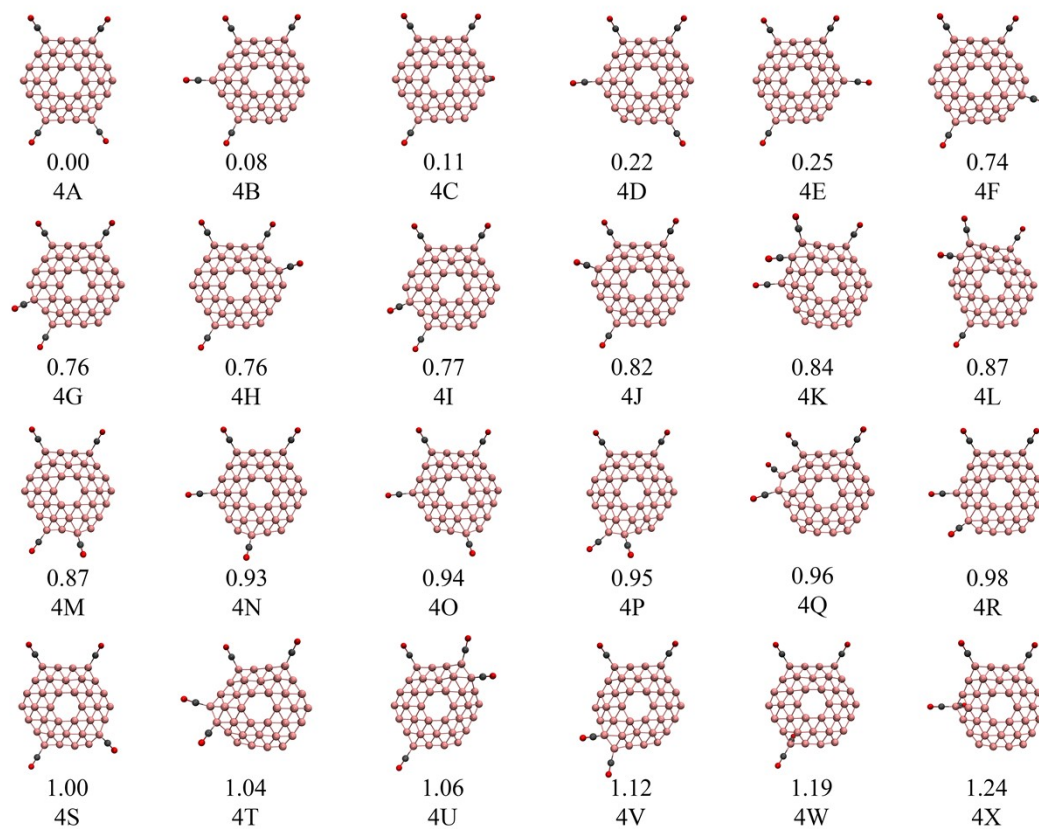

(b)  $n = 5$

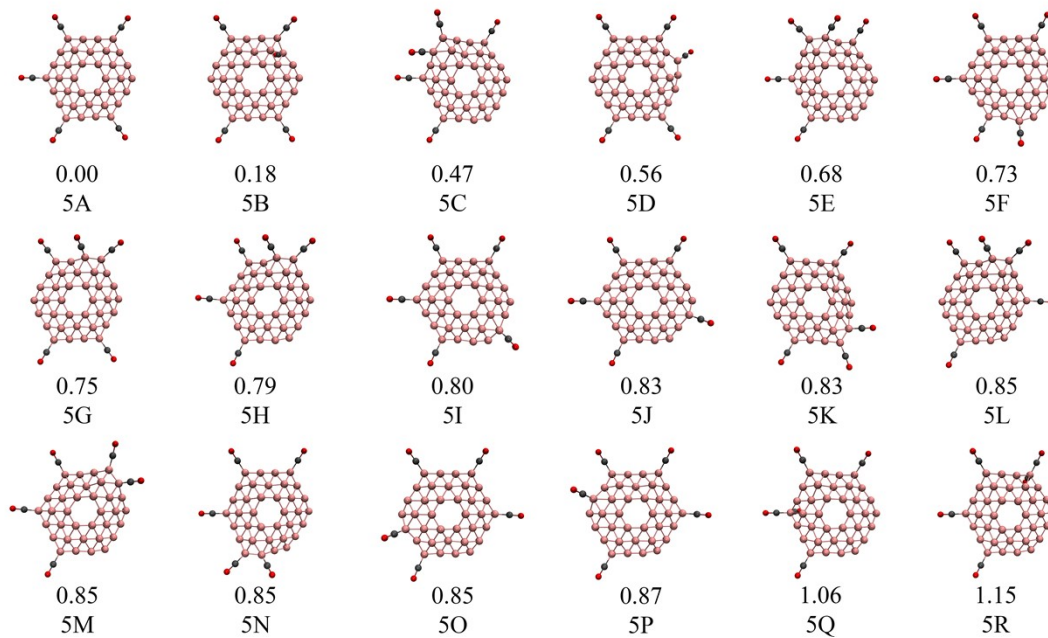

**Fig.S3** Optimized low-lying isomers of  $B_{36}(CO)_n^+$  ( $n = 4, 5$ ) at PBE0-D3/6-311+G(d) level, with the relative energies ( $\Delta E$ ) indicated in eV.

(a)  $n = 6$

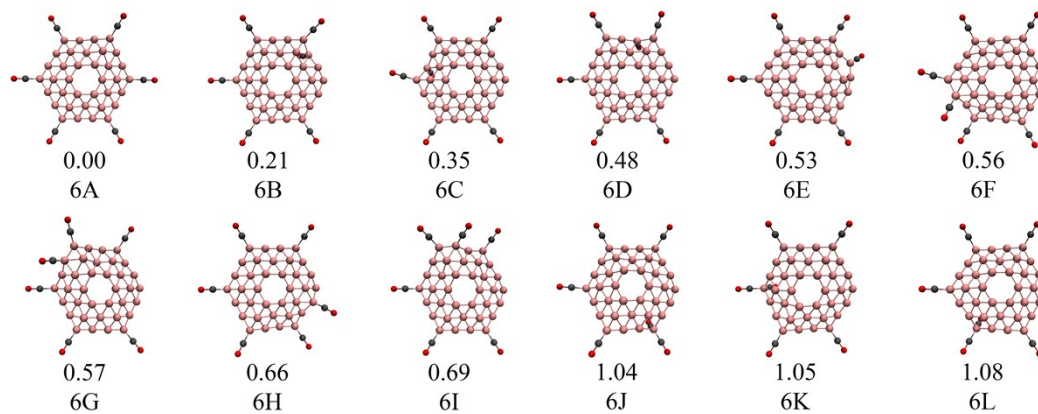

(b)  $n = 7$

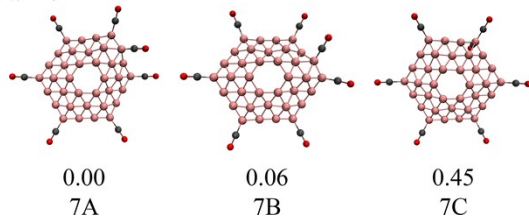

**Fig.S4** Optimized low-lying isomers of  $B_{36}(CO)_n^+$  ( $n = 6, 7$ ) at PBE0-D3/6-311+G(d) level, with the relative energies ( $\Delta E$ ) indicated in eV.

(a)  $n = 1$

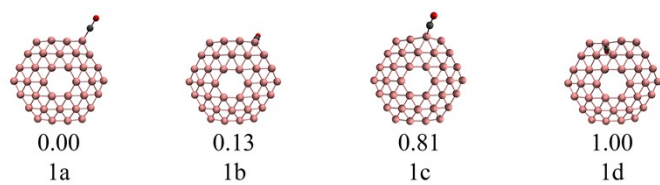

(b)  $n = 2$

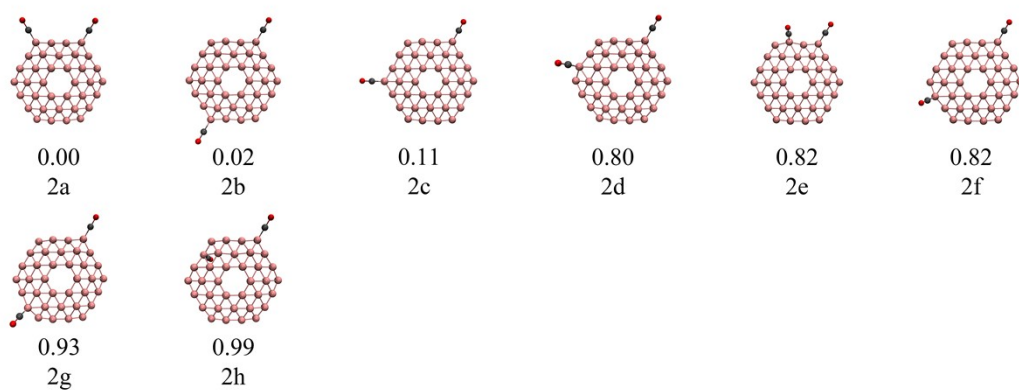

(c)  $n = 3$

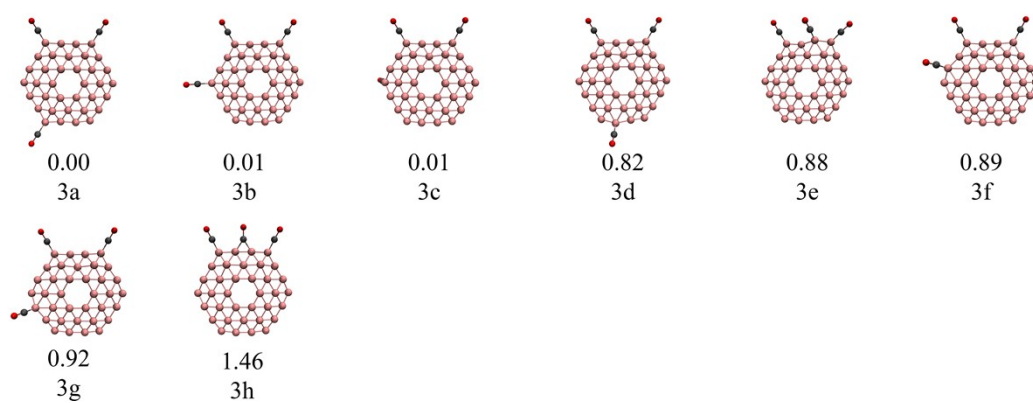

**Fig.S5** Optimized low-lying isomers of  $B_{36}(CO)_n$  ( $n = 1-3$ ) at PBE0-D3/6-311+G(d) level, with the relative energies ( $\Delta E$ ) indicated in eV.



(a)  $n = 4$

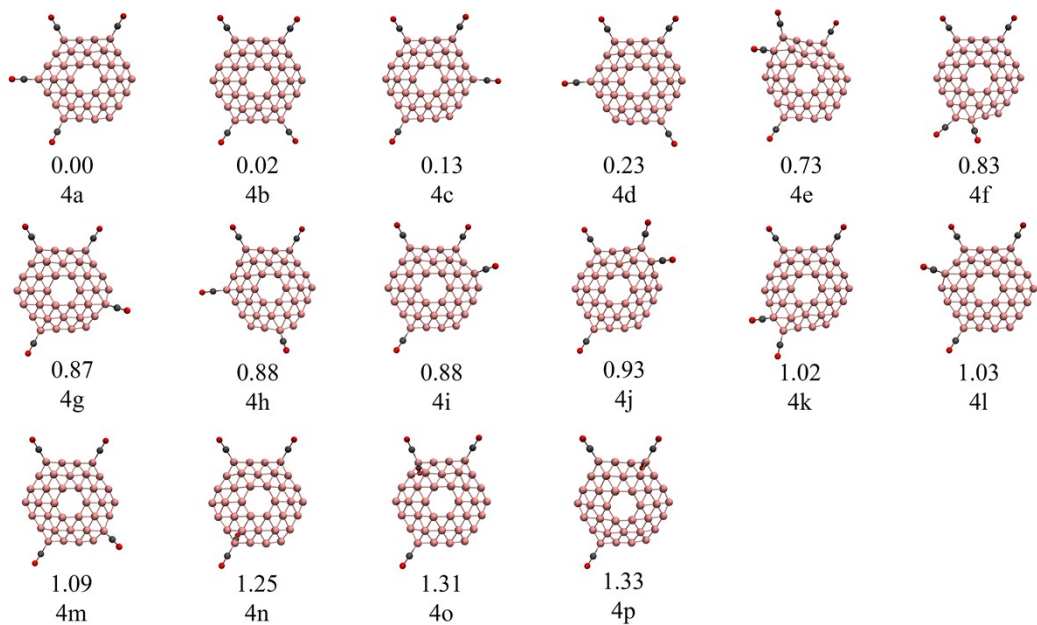

(b)  $n = 5$

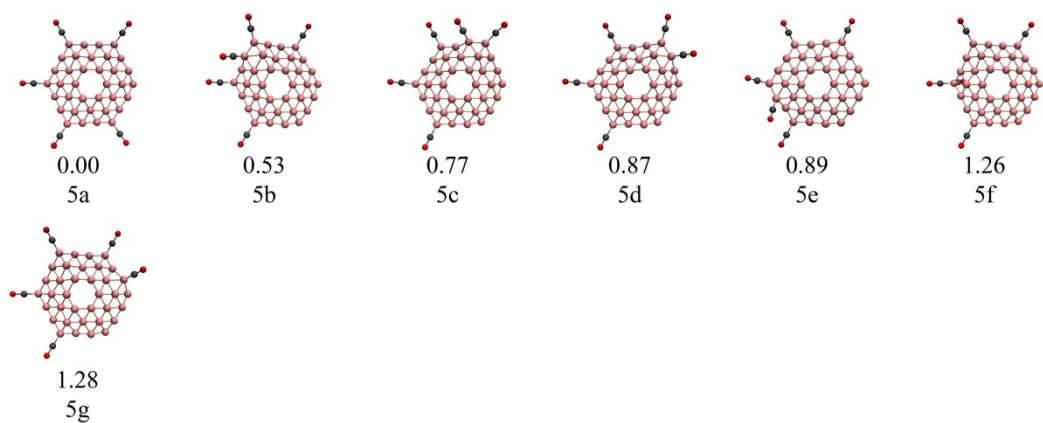

(c)  $n = 6$

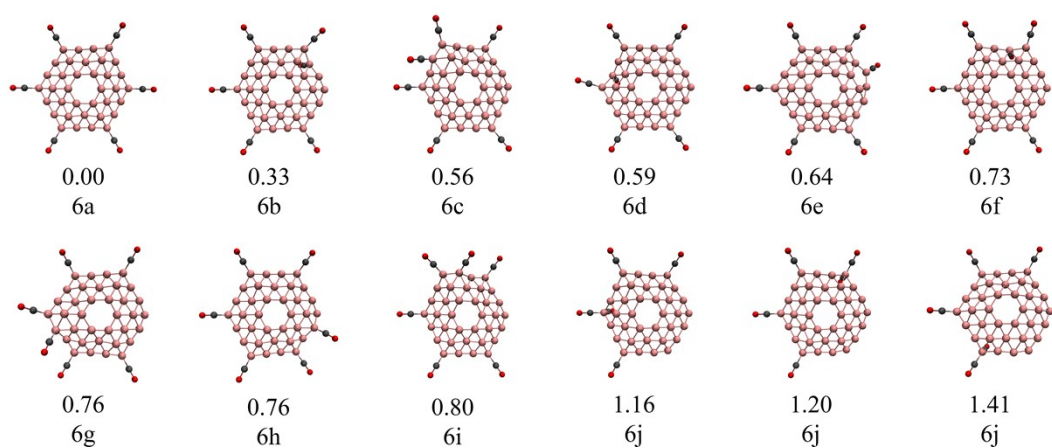

**Fig.S6** Optimized low-lying isomers of  $B_{36}(CO)_n$  ( $n = 4-6$ ) at PBE0-D3/6-311+G(d) level, with the relative energies ( $\Delta E$ ) indicated in eV.

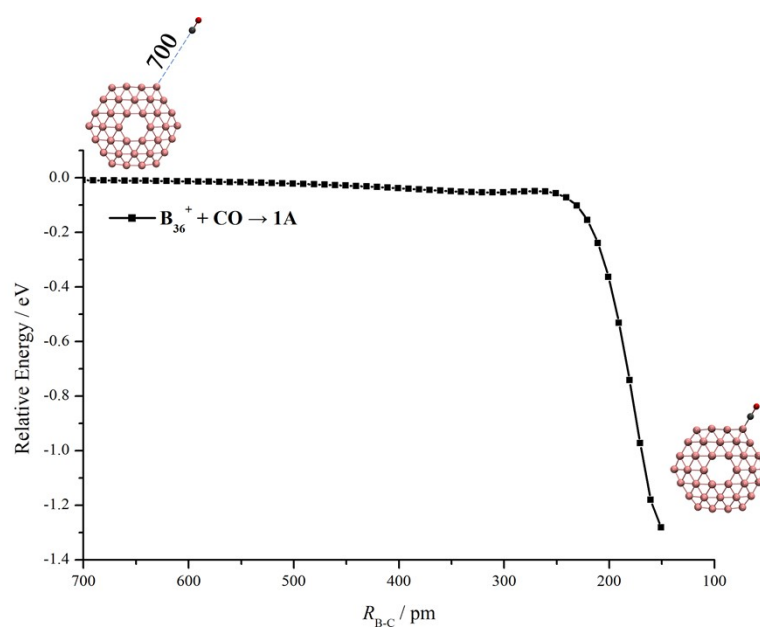

**Fig.S7** Calculated relaxed potential energy curves for the approach of CO toward  $B_{36}^+$  to form  $B_{36}CO^+$  (1a) at PBE0/6-311+G(d), with the B–CO distances indicated in pm.



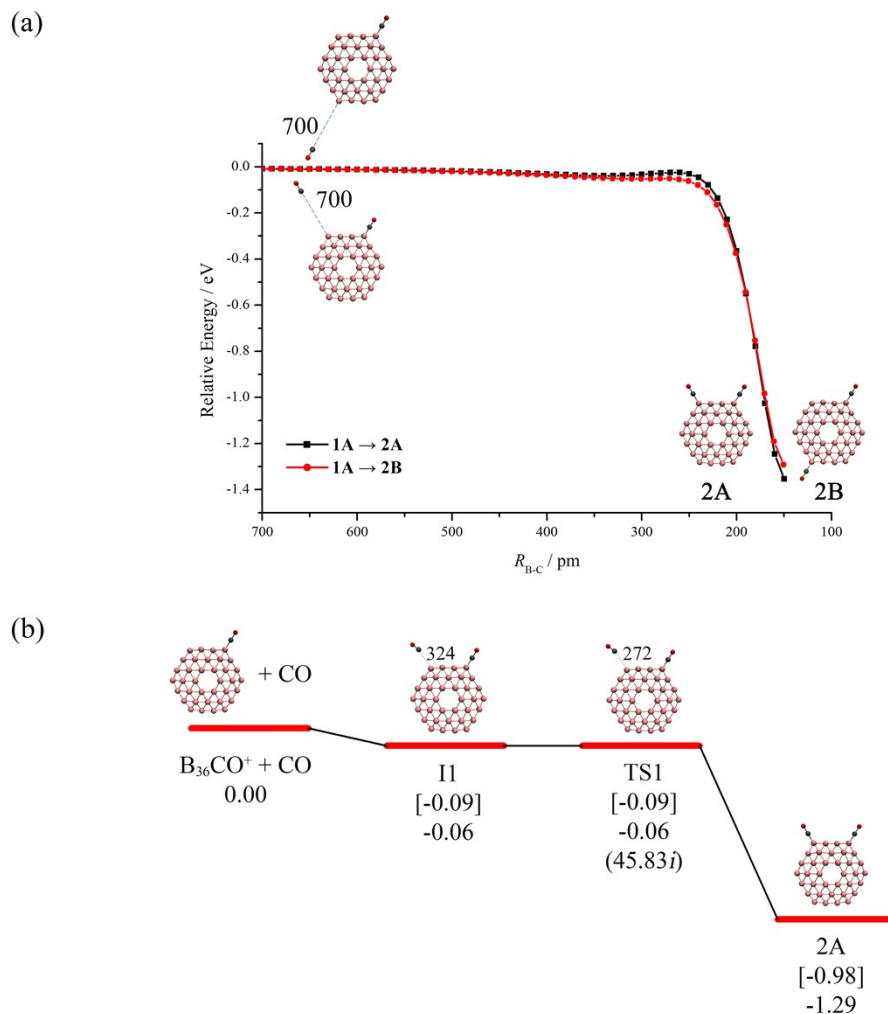

**Fig.S8** (a) Calculated relaxed potential energy curves for the approach of CO toward  $B_{36}CO^+(1A)$  to form  $B_{36}(CO)_2^+(2A, 2B)$  at PBE0/6-311+G(d). (b) Potential energy profile for the formation of **2A** and **2B** from **1A** and CO, calculated at the PBE0-D3/6-311+G(d) level of theory. The profile indicates the B–CO distances (in pm) and the imaginary vibrational frequency of TS1 (in  $cm^{-1}$ ), with all values including zero-point energy corrections. The relative energies in square brackets are from DLPNO-CCSD(T)/def2-SVP single-point calculations on the PBE0-D3/6-311+G(d) optimized structures.

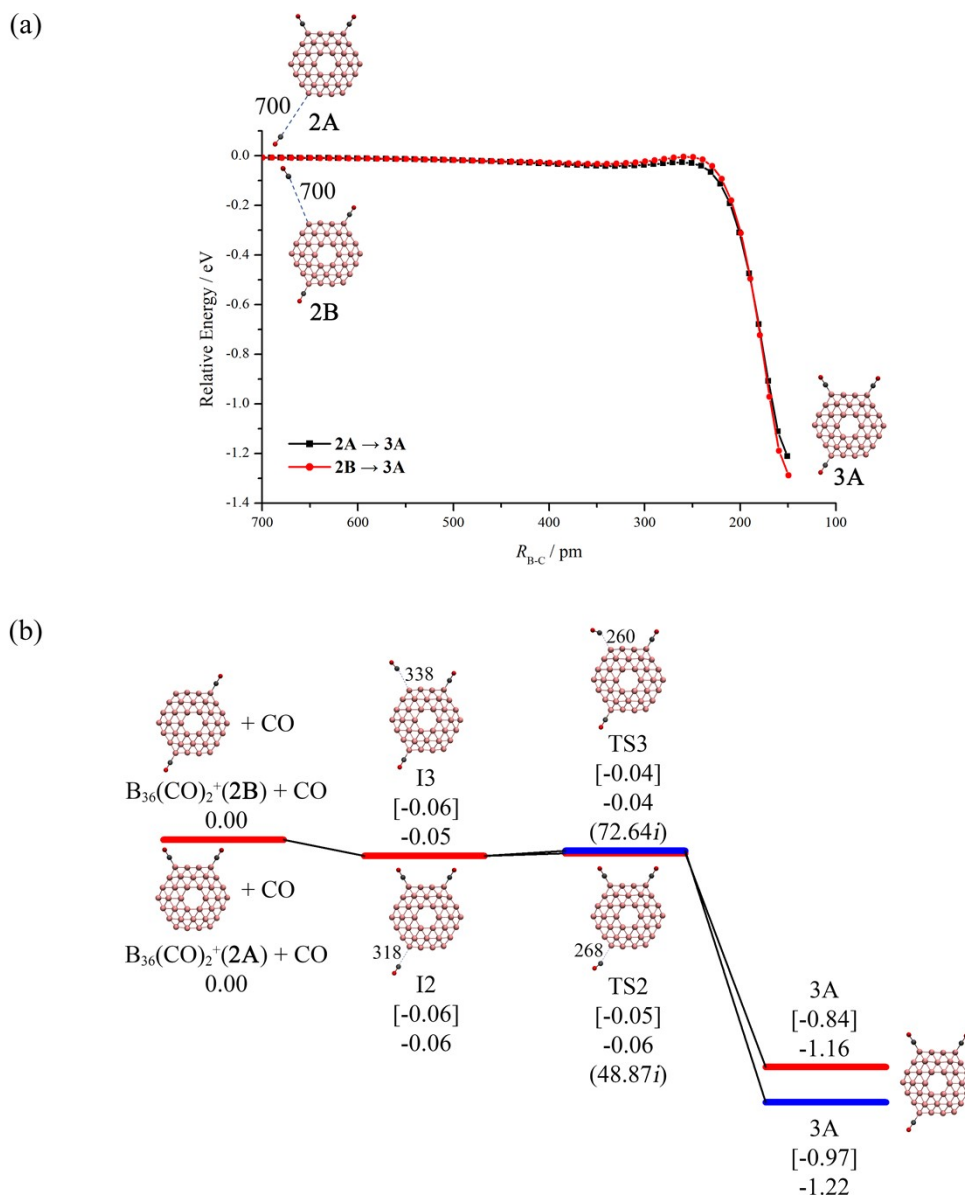

**Fig.S9** (a) Calculated relaxed potential energy curves for the approach of CO toward  $B_{36}(CO)_2^+$  (**2A**, **2B**) to form  $B_{36}(CO)_3^+$  (**3A**) at PBE0/6-311+G(d). (b) Potential energy profile for the formation of **3A** from a mixture of **2A** and **2B** with CO, calculated at the PBE0-D3/6-311+G(d) level of theory. The profile indicates the B–CO distances (in pm) and the imaginary vibrational frequency of TS2 and TS3 (in  $cm^{-1}$ ), with all values including zero-point energy corrections. The relative energies in square brackets are from DLPNO-CCSD(T)/def2-SVP single-point calculations on the PBE0-D3/6-311+G(d) optimized structures.

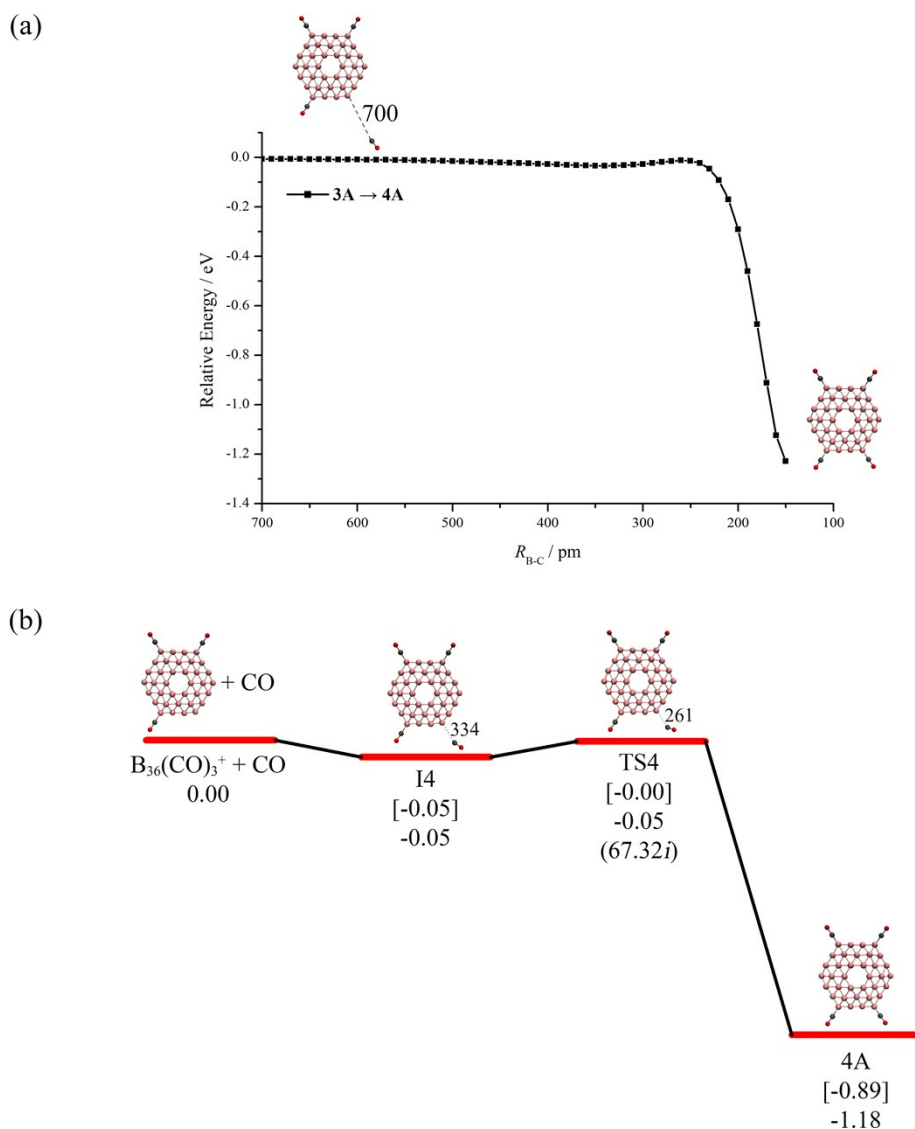

**Fig.S10** (a) Calculated relaxed potential energy curves for the approach of CO toward  $B_{36}(CO)_3^+$ (**3A**) to form  $B_{36}(CO)_4^+$ (**4A**) at PBE0/6-311+G(d). (b) Potential energy profile for the formation of **4A** from **3A** and CO, calculated at the PBE0-D3/6-311+G(d) level of theory. The profile indicates the B–CO distances (in pm) and the imaginary vibrational frequency of TS4 (in  $\text{cm}^{-1}$ ), with all values including zero-point energy corrections. The relative energies in square brackets are from DLPNO-CCSD(T)/def2-SVP single-point calculations on the PBE0-D3/6-311+G(d) optimized structures.

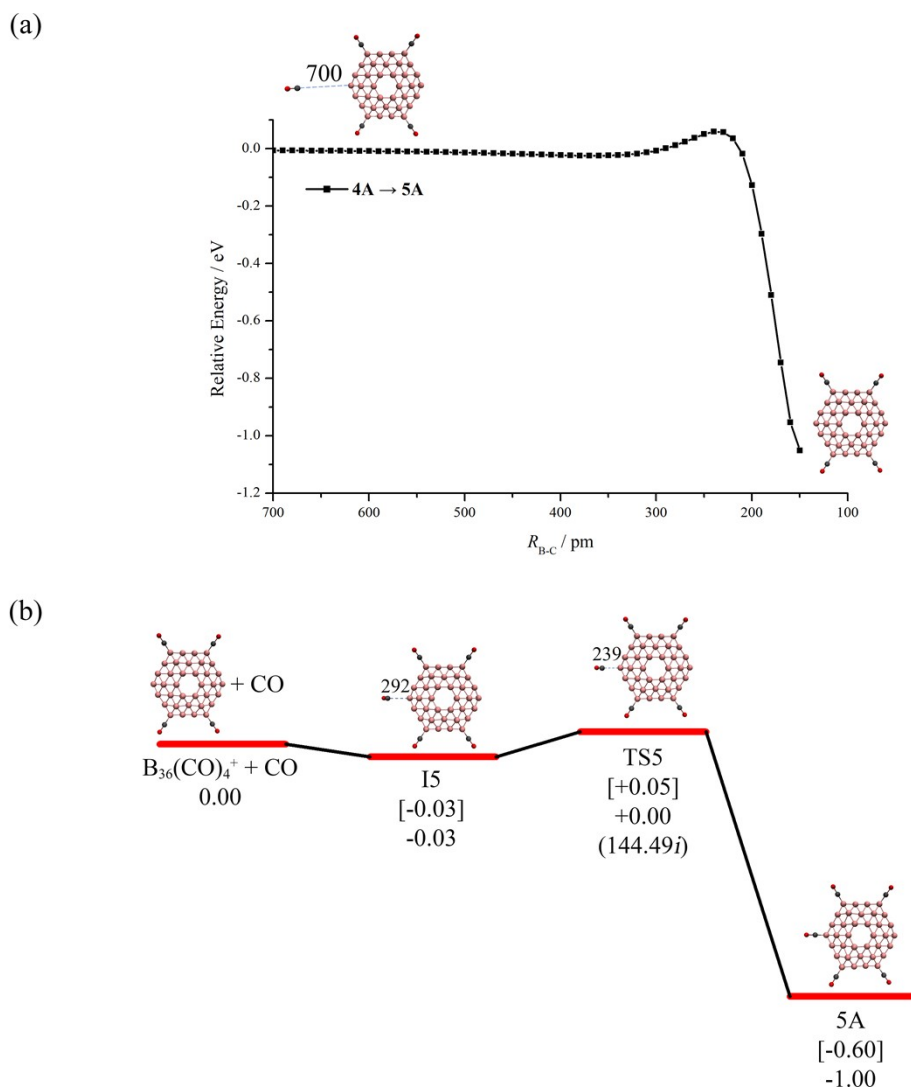

**Fig.S11** (a) Calculated relaxed potential energy curves for the approach of CO toward  $B_{36}(CO)_4^+(4A)$  to form  $B_{36}(CO)_5^+(5A)$  at PBE0/6-311+G(d). (b) Potential energy profile for the formation of **5A** from **4A** and CO, calculated at the PBE0-D3/6-311+G(d) level of theory. The profile indicates the B–CO distances (in pm) and the imaginary vibrational frequency of TS5 (in  $\text{cm}^{-1}$ ), with all values including zero-point energy corrections. The relative energies in square brackets are from DLPNO-CCSD(T)/def2-SVP single-point calculations on the PBE0-D3/6-311+G(d) optimized structures.

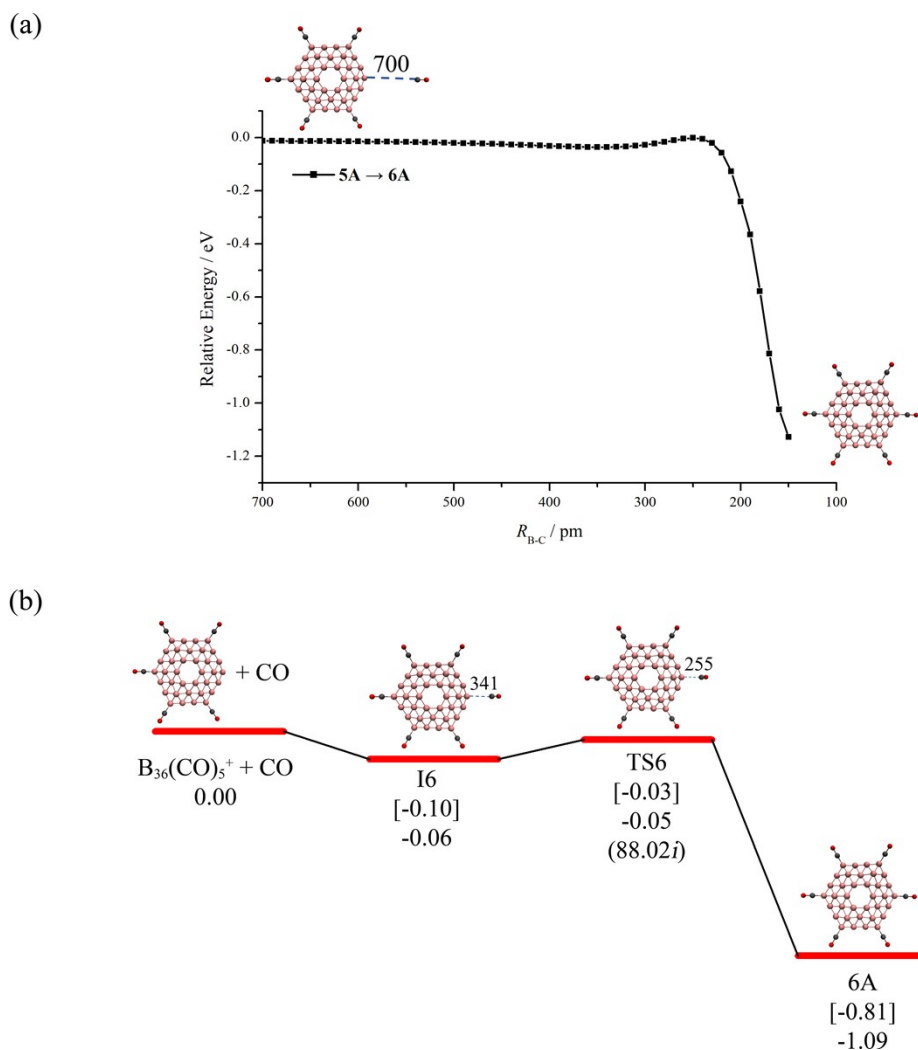

**Fig.S12** (a) Calculated relaxed potential energy curves for the approach of CO toward  $B_{36}(CO)_5^+$  (**5A**) to form  $B_{36}(CO)_6^+$  (**6A**) at PBE0/6-311+G(d). (b) Potential energy profile for the formation of **6A** from **5A** and CO, calculated at the PBE0-D3/6-311+G(d) level of theory. The profile indicates the B–CO distances (in pm) and the imaginary vibrational frequency of TS6 (in  $\text{cm}^{-1}$ ), with all values including zero-point energy corrections. The relative energies in square brackets are from DLPNO-CCSD(T)/def2-SVP single-point calculations on the PBE0-D3/6-311+G(d) optimized structures.

(a)

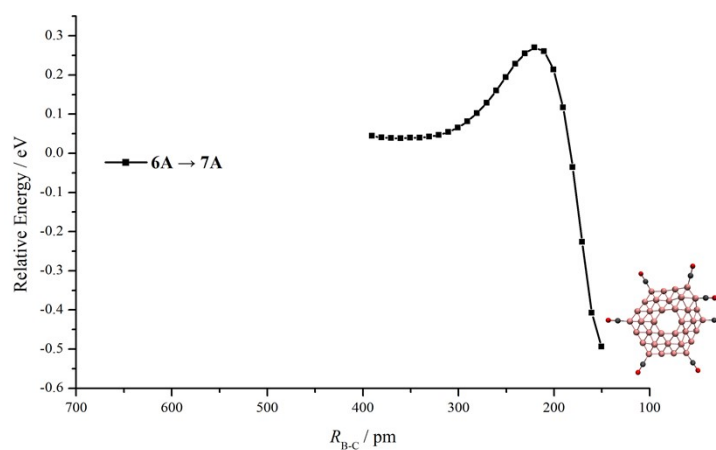

(b)

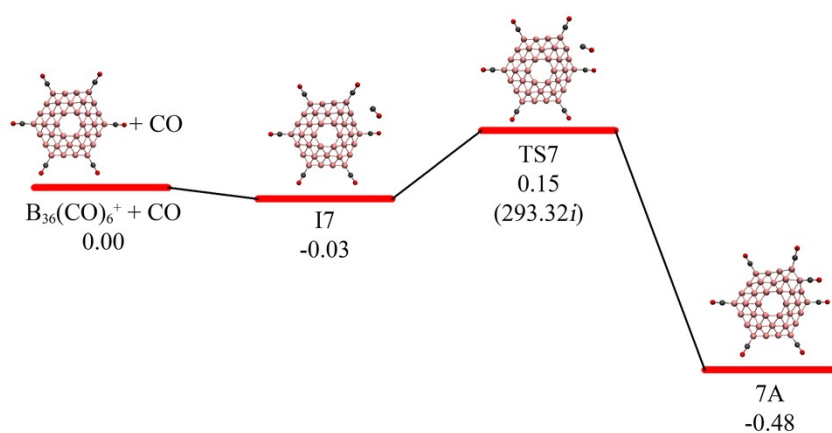

**Fig.S13** (a) Calculated relaxed potential energy curves for the approach of CO toward  $B_{36}(CO)_6^+$ (**6A**) to form  $B_{36}(CO)_7^+$ (**7A**) at PBE0/6-311+G(d). (b) Potential energy profile for the formation of **7A** from **6A** and CO, calculated at the PBE0-D3/6-311+G(d) level of theory. The profile indicates the B–CO distances (in pm) and the imaginary vibrational frequency of TS7 (in  $\text{cm}^{-1}$ ), with all values including zero-point energy corrections.



(a)

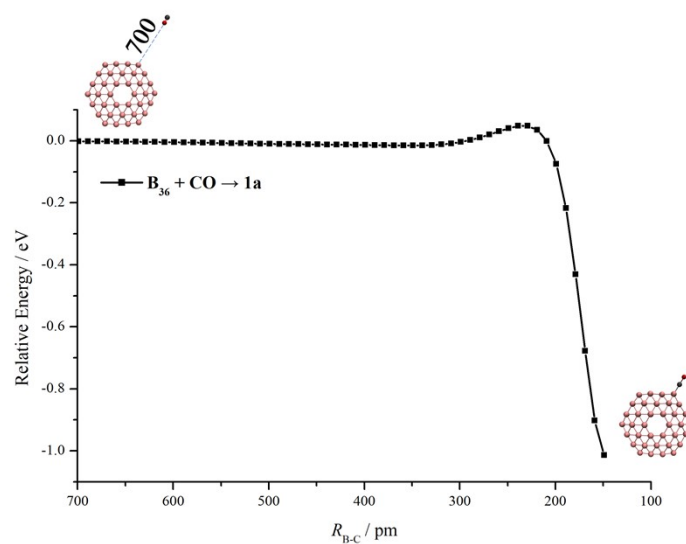

(b)

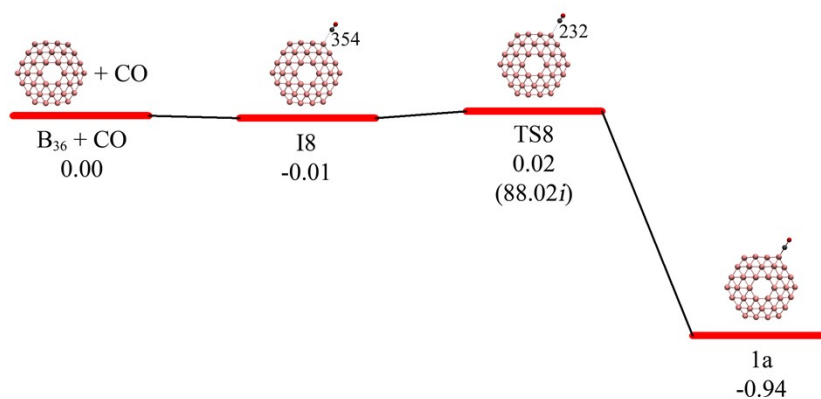

**Fig.S14** (a) Calculated relaxed potential energy curves for the approach of CO toward  $B_{36}$  to form  $B_{36}CO$  (**1a**) at PBE0/6-311+G(d). (b) Potential energy profile for the formation of **1a** from  $B_{36}$  and CO, calculated at the PBE0-D3/6-311+G(d) level of theory. The profile indicates the B–CO distances (in pm) and the imaginary vibrational frequency of TS8 (in  $cm^{-1}$ ), with all values including zero-point energy corrections.

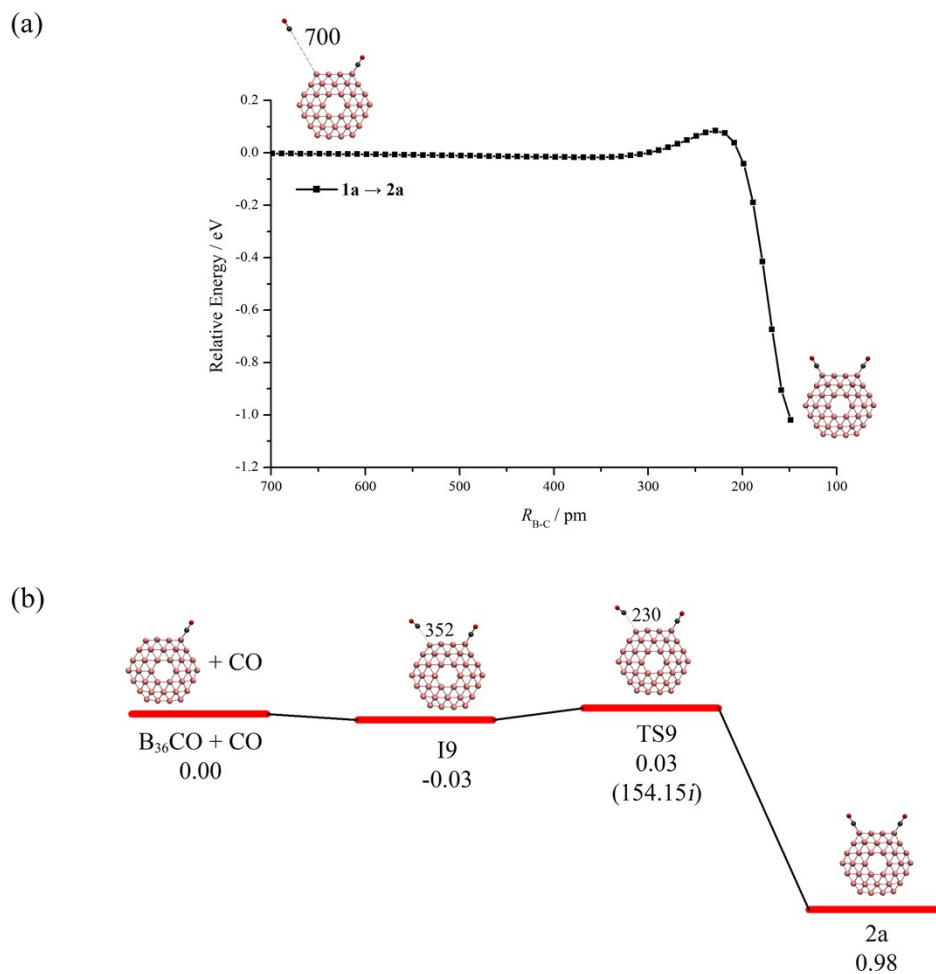

**Fig.S15** (a) Calculated relaxed potential energy curves for the approach of CO toward B<sub>36</sub>CO (**1a**) to form B<sub>36</sub>(CO)<sub>2</sub> (**2a**) at PBE0/6-311+G(d). (b) Potential energy profile for the formation of **2a** from **1a** and CO, calculated at the PBE0-D3/6-311+G(d) level of theory. The profile indicates the B–CO distances (in pm) and the imaginary vibrational frequency of TS9 (in cm<sup>-1</sup>), with all values including zero-point energy corrections.

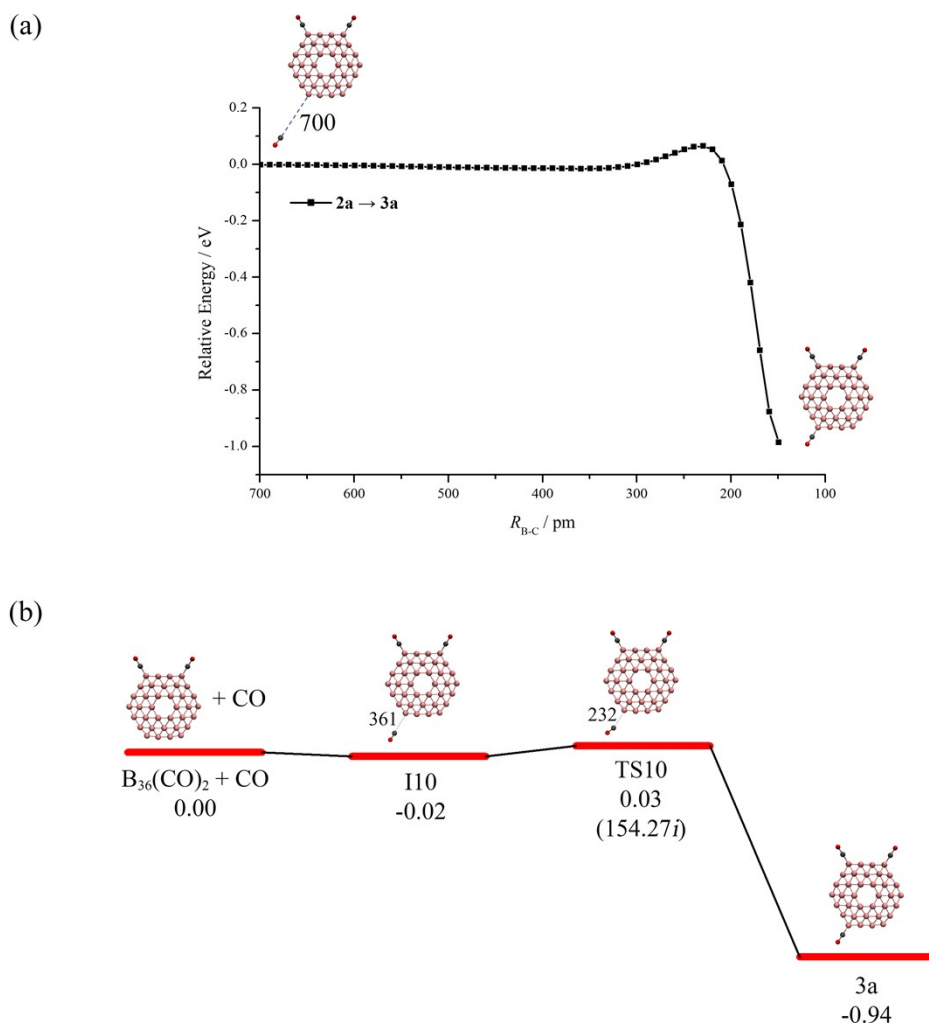

**Fig.S16** (a) Calculated relaxed potential energy curves for the approach of CO toward B<sub>36</sub>(CO)<sub>2</sub> (**2a**) to form B<sub>36</sub>(CO)<sub>3</sub> (**3a**) at PBE0/6-311+G(d). (b) Potential energy profile for the formation of **3a** from **2a** and CO, calculated at the PBE0-D3/6-311+G(d) level of theory. The profile indicates the B–CO distances (in pm) and the imaginary vibrational frequency of TS10 (in cm<sup>-1</sup>), with all values including zero-point energy corrections.

(a)

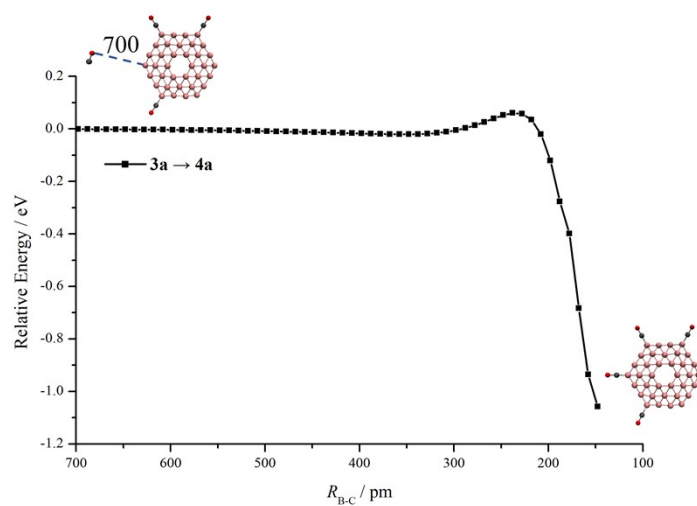

(b)

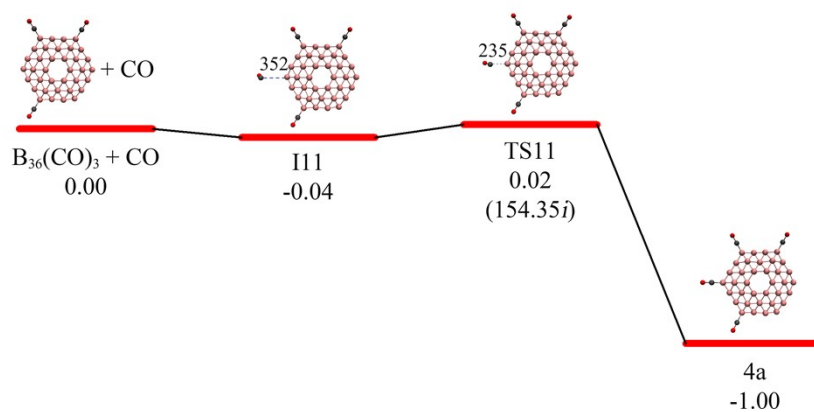

**Fig.S17** (a) Calculated relaxed potential energy curves for the approach of CO toward B<sub>36</sub>(CO)<sub>3</sub> (**3a**) to form B<sub>36</sub>(CO)<sub>4</sub> (**4a**) at PBE0/6-311+G(d). (b) Potential energy profile for the formation of **4a** from **3a** and CO, calculated at the PBE0-D3/6-311+G(d) level of theory. The profile indicates the B–CO distances (in pm) and the imaginary vibrational frequency of TS11 (in cm<sup>-1</sup>), with all values including zero-point energy corrections.

(a)

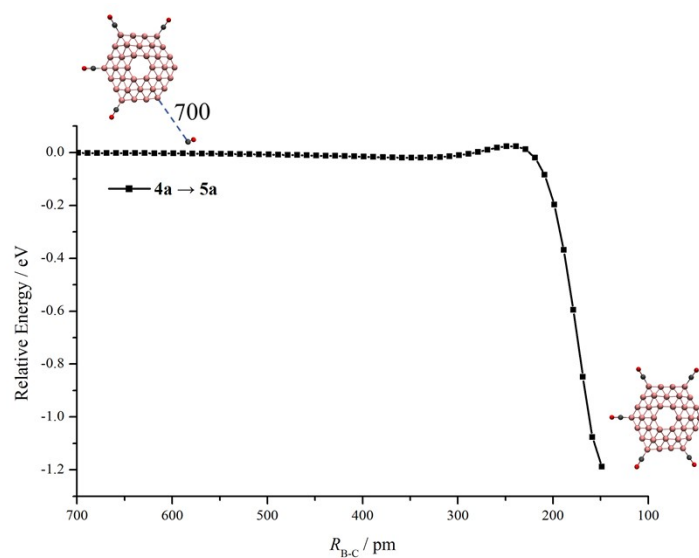

(b)

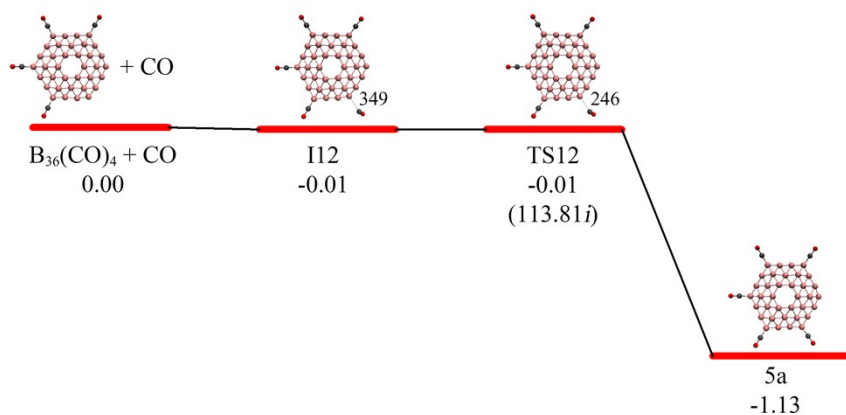

**Fig.S18** (a) Calculated relaxed potential energy curves for the approach of CO toward  $B_{36}(CO)_4$  (**4a**) to form  $B_{36}(CO)_5$  (**5a**) at PBE0/6-311+G(d). (b) Potential energy profile for the formation of **5a** from **4a** and CO, calculated at the PBE0-D3/6-311+G(d) level of theory. The profile indicates the B–CO distances (in pm) and the imaginary vibrational frequency of TS12 (in  $\text{cm}^{-1}$ ), with all values including zero-point energy corrections.

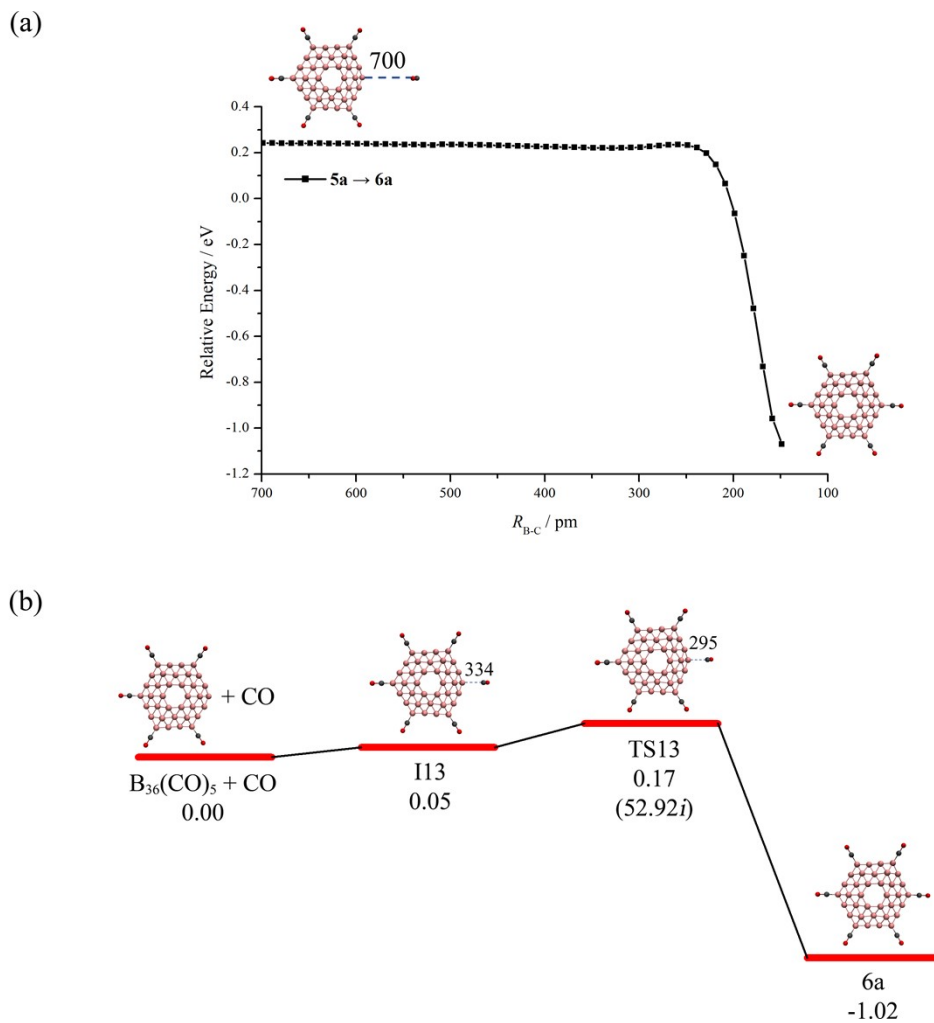

**Fig.S19** (a) Calculated relaxed potential energy curves for the approach of CO toward  $B_{36}(CO)_5$  (**6a**) to form  $B_{36}(CO)_6$  (**6a**) at PBE0/6-311+G(d). (b) Potential energy profile for the formation of **6a** from **5a** and CO, calculated at the PBE0-D3/6-311+G(d) level of theory. The profile indicates the B–CO distances (in pm) and the imaginary vibrational frequency of TS13 (in  $\text{cm}^{-1}$ ), with all values including zero-point energy corrections.



(a)  $C_s B_{36}CO^+$  (1A)

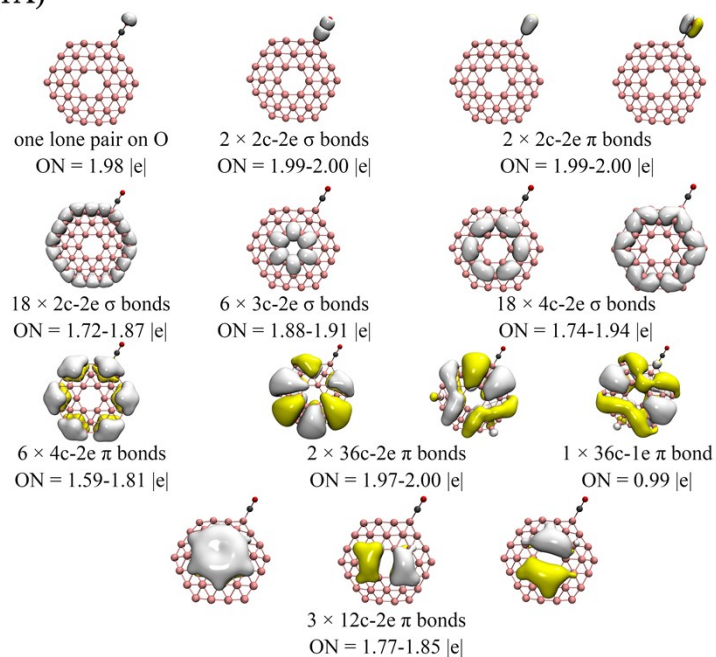

(b)  $C_{2v} B_{36}(CO)_2^+$  (2A)

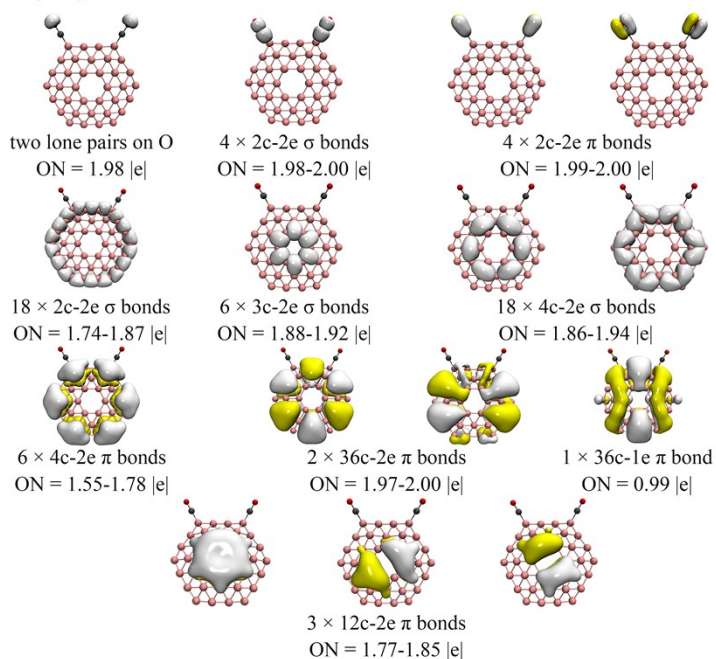

**Fig.S20** AdNDP bonding patterns of (a)  $C_s B_{36}CO^+$  (1A) and (b)  $C_{2v} B_{36}(CO)_2^+$  (2A), with the occupation numbers (ONs) indicated.

(a)  $C_1 B_{36}(CO)_3^+$  (**3A**)

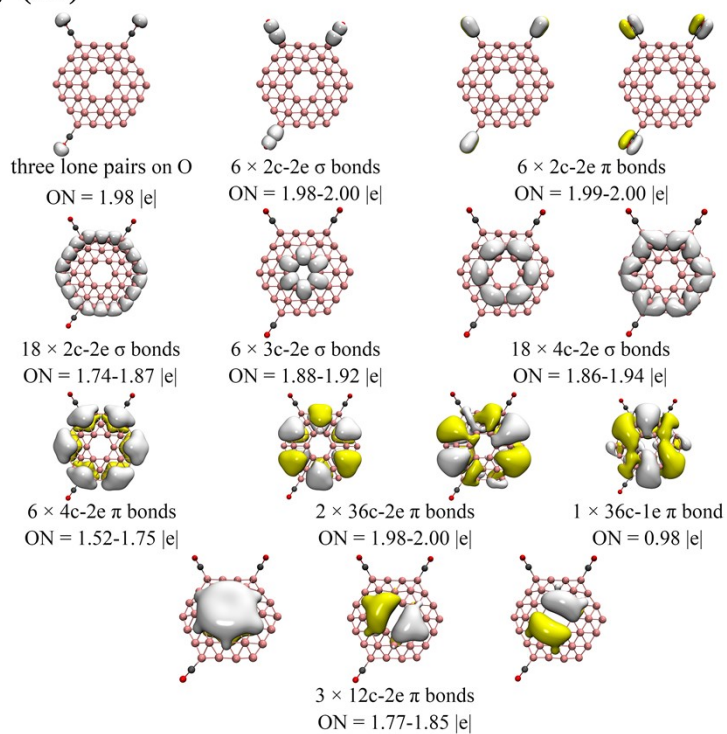

(b)  $C_{2v} B_{36}(CO)_4^+$  (**4A**)

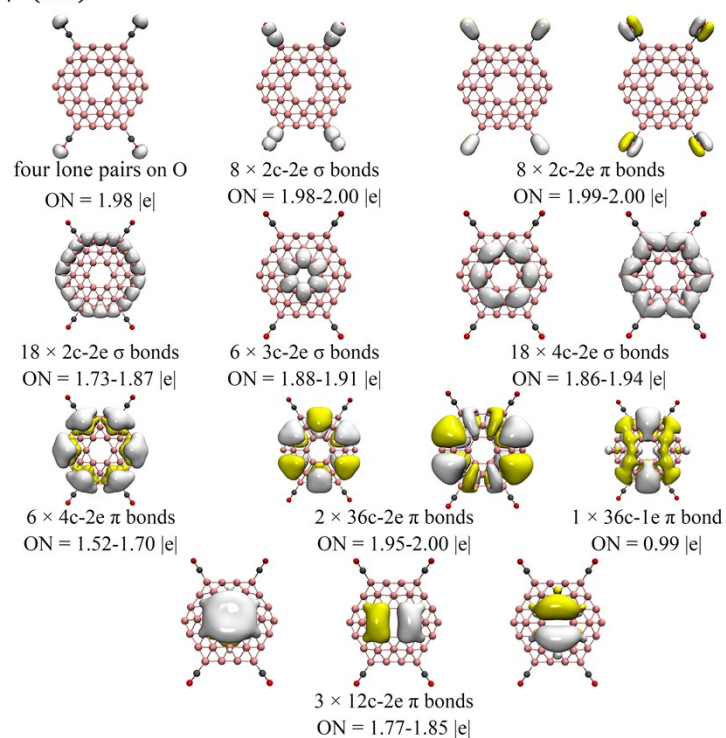

**Fig.S21** AdNDP bonding patterns of (a)  $C_1 B_{36}(CO)_3^+$  (**3A**) and (b)  $C_{2v} B_{36}(CO)_4^+$  (**4A**), with the occupation numbers (ONs) indicated.

(a)  $C_s B_{36}(CO)_5^+$  (**5A**)

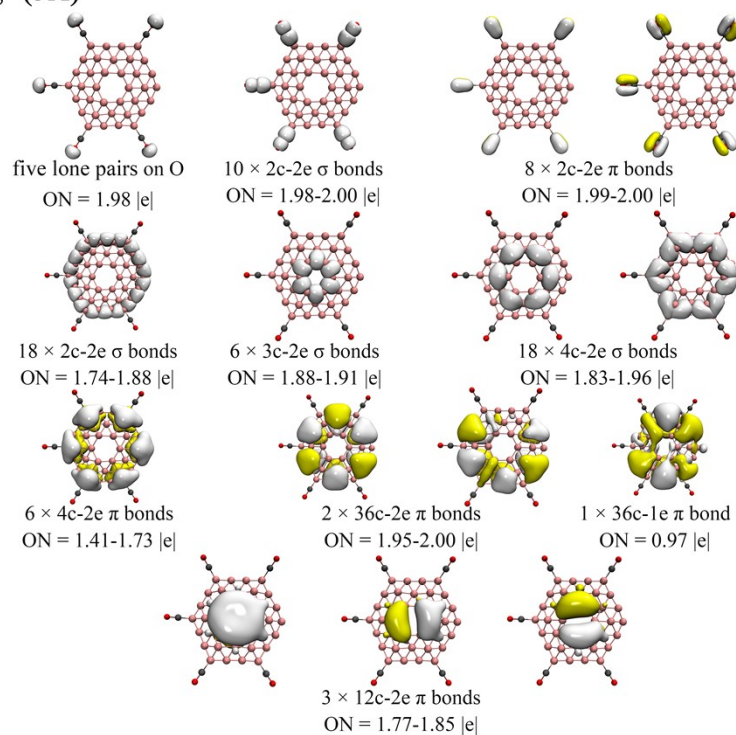

(b)  $C_s B_{36}(CO)_6^+$  (**6A**)

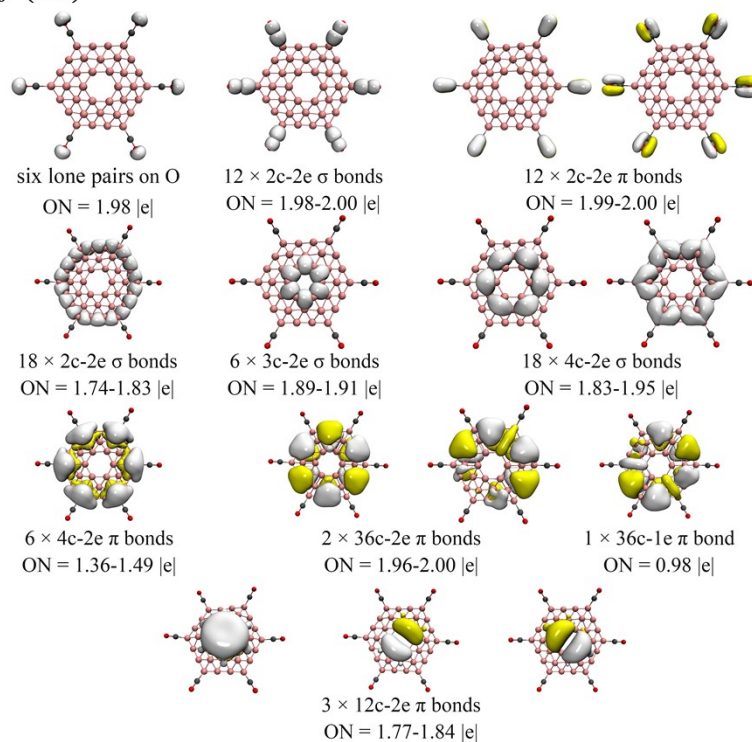

**Fig.S22** AdNDP bonding patterns of (a)  $C_s B_{36}(CO)_5^+$  (**5A**) and (b)  $C_s B_{36}(CO)_6^+$  (**6A**), with the occupation numbers (ONs) indicated.

(a)  $C_s B_{36}CO$  (**1a**)

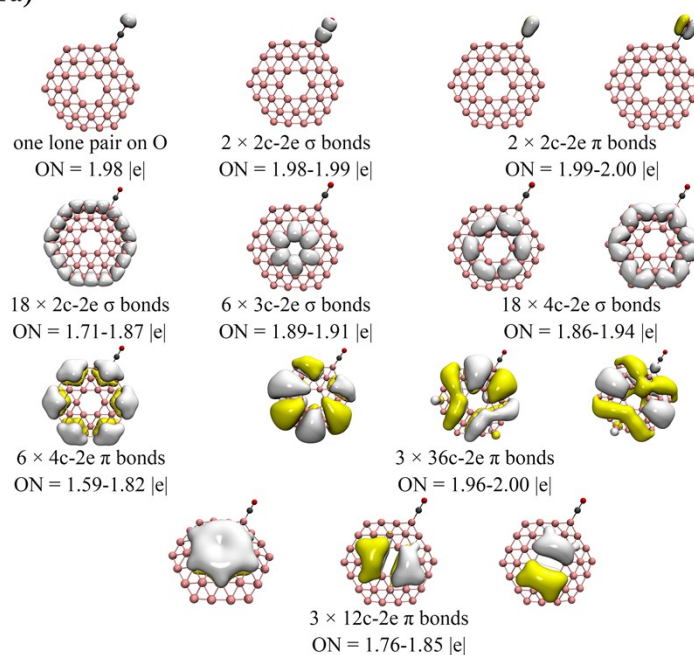

(b)  $C_s B_{36}(CO)_2$  (**2a**)

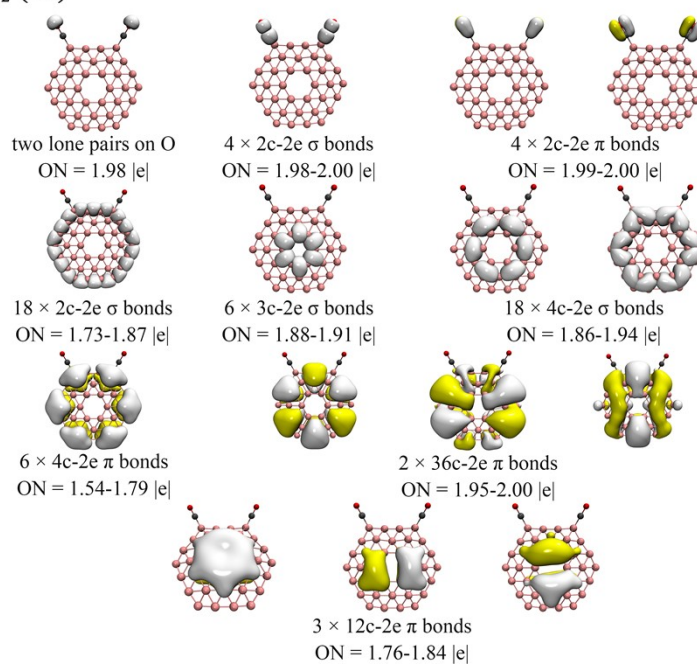

**Fig.S23** AdNDP bonding patterns of (a)  $C_s B_{36}CO$  (**1a**) and (b)  $C_s B_{36}(CO)_2$  (**2a**), with the occupation numbers (ONs) indicated.



(a)  $C_1 B_{36}(CO)_3$  (**3a**)

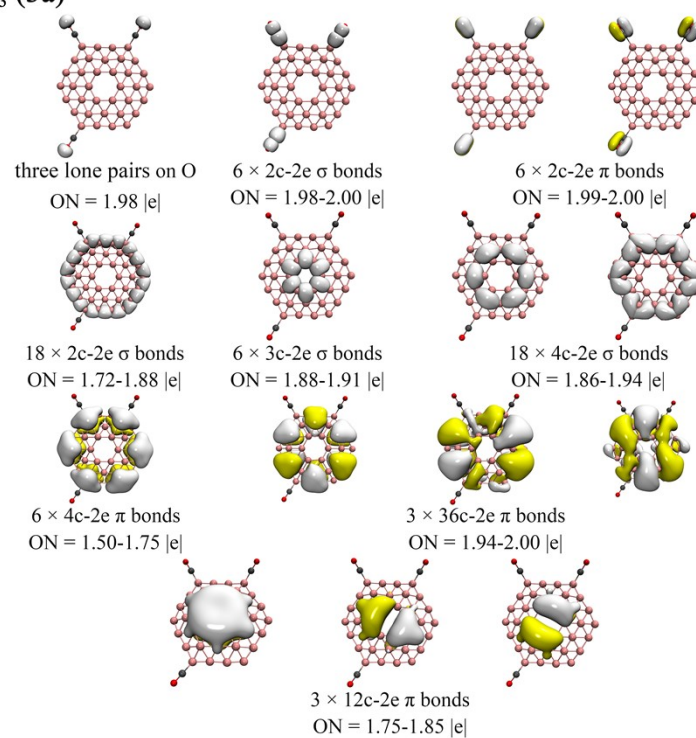

(b)  $C_1 B_{36}(CO)_4$  (**4a**)

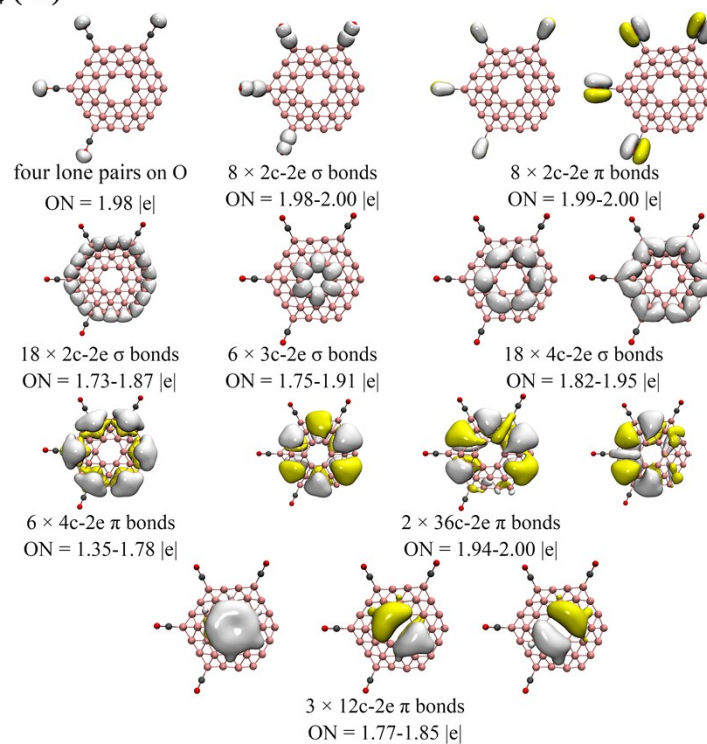

**Fig.S24** AdNDP bonding patterns of (a)  $C_1 B_{36}(CO)_3$  (**3a**) and (b)  $C_1 B_{36}(CO)_4$  (**4a**), with the occupation numbers (ONs) indicated.

(a)  $C_s$   $B_{36}(CO)_5$  (**5a**)

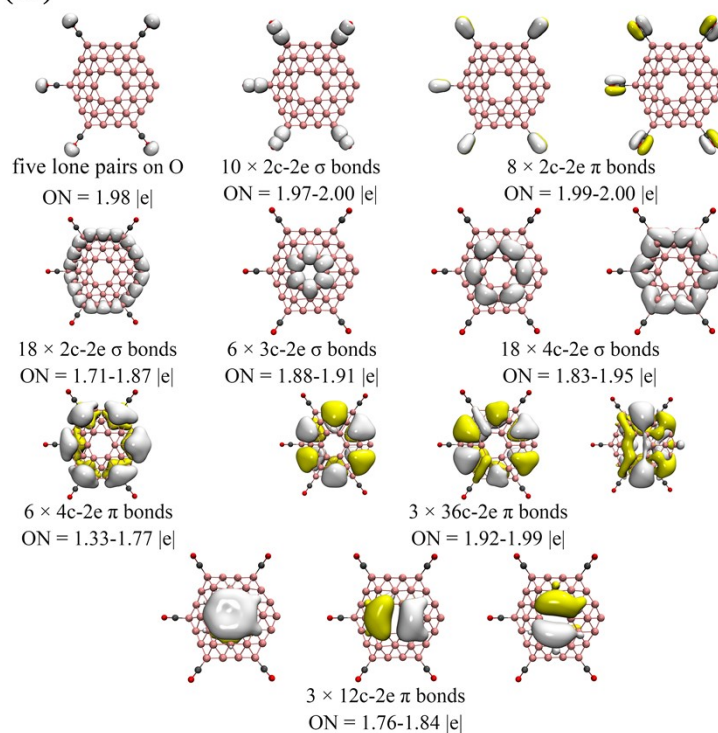

(b)  $C_{3v}$   $B_{36}(CO)_6$  (**6a**)

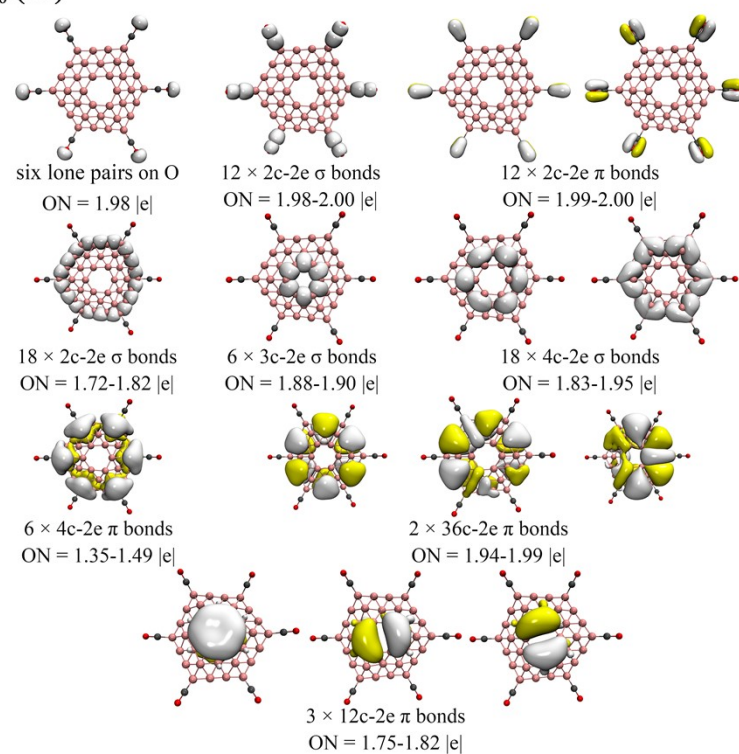

**Fig.S25** AdNDP bonding patterns of (a)  $C_s$   $B_{36}(CO)_5$  (**5a**) and (b)  $C_{3v}$   $B_{36}(CO)_6$  (**6a**), with the occupation numbers (ONs) indicated.



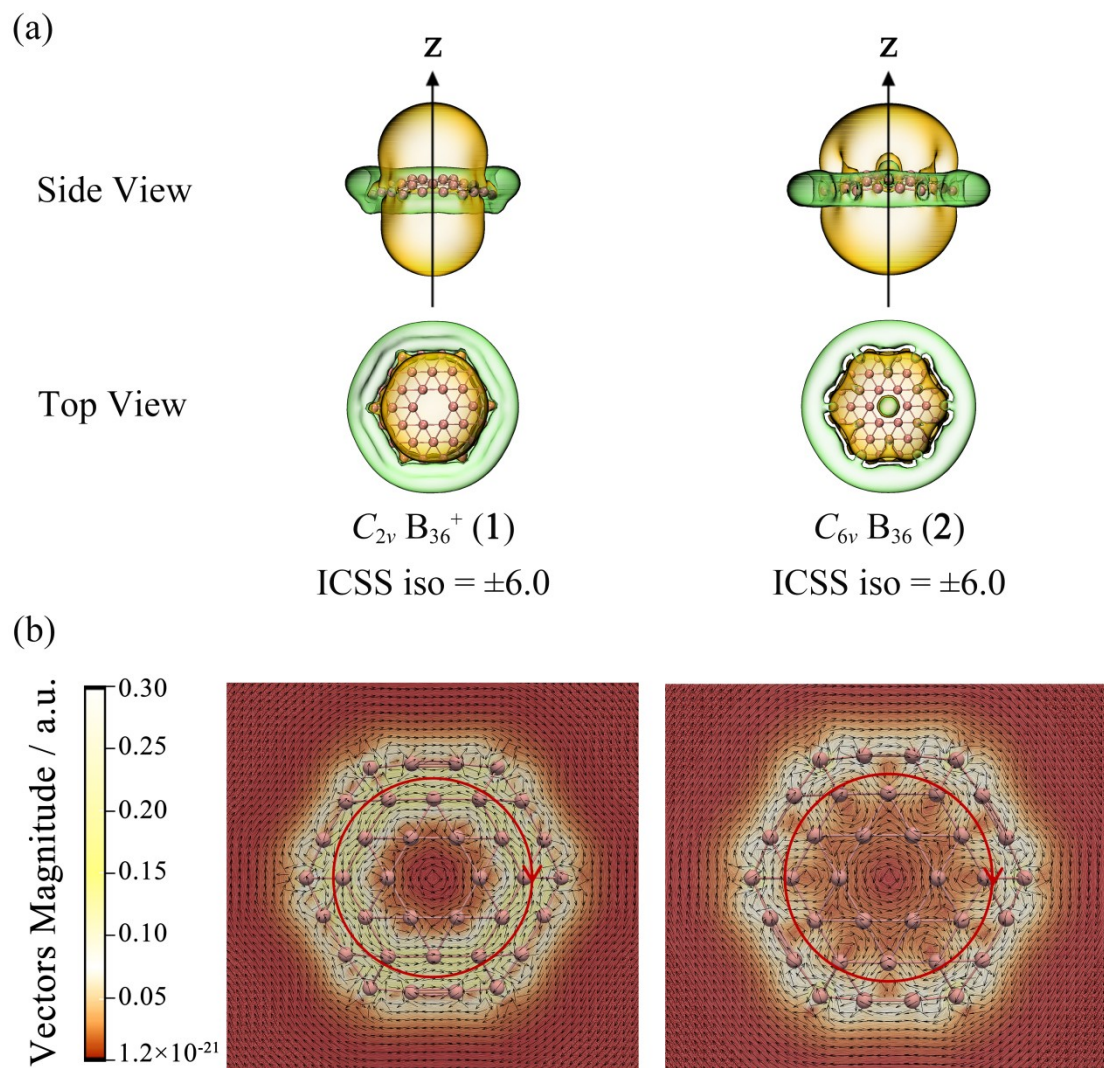

**Fig.S26** (a) Calculated ICSS surfaces of  $C_{2v} B_{36}^+$  (1),  $C_{6v} B_{36}$  (2) at PBE0 level. Yellow and green regions stand for chemical shielding and de-shielding areas, respectively. (b) The corresponding calculated GIMIC plots 1.0 Å above the molecular planes, with the calculated ring current densities indicated in a.u. in the colour scale. The external magnetic field is perpendicular to the molecular plane. The red arrows represent directions of the ring currents on the GIMIC iso-surfaces.

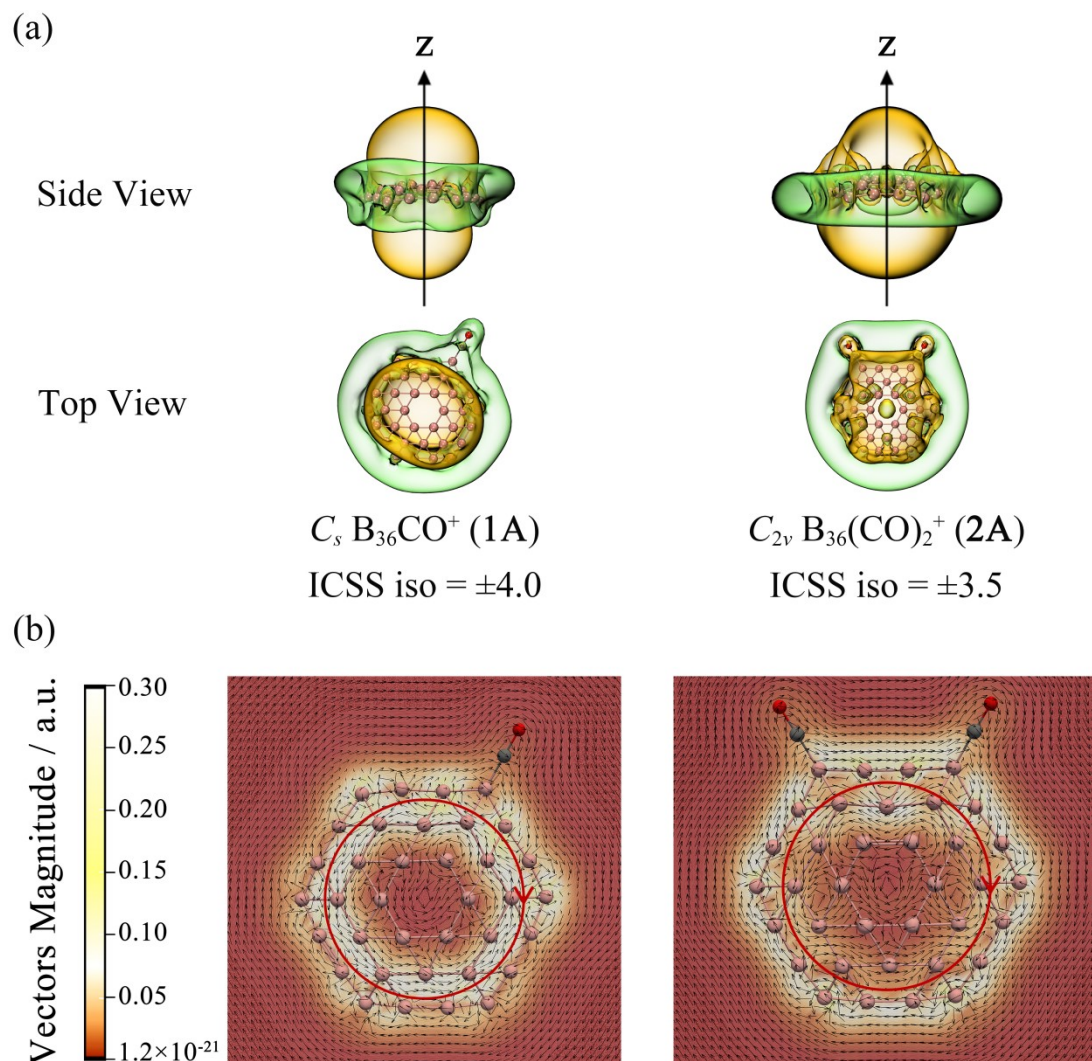

**Fig.S27** (a) Calculated ICSS surfaces of  $C_s B_{36}CO^+$  (**1A**),  $C_{2v} B_{36}(CO)_2^+$  (**2A**) at PBE0 level. Yellow and green regions stand for chemical shielding and de-shielding areas, respectively. (b) The corresponding calculated GIMIC plots 1.0 Å above the molecular planes, with the calculated ring current densities indicated in a.u. in the colour scale. The external magnetic field is perpendicular to the molecular plane. The red arrows represent directions of the ring currents on the

GIMIC

iso-surfaces.

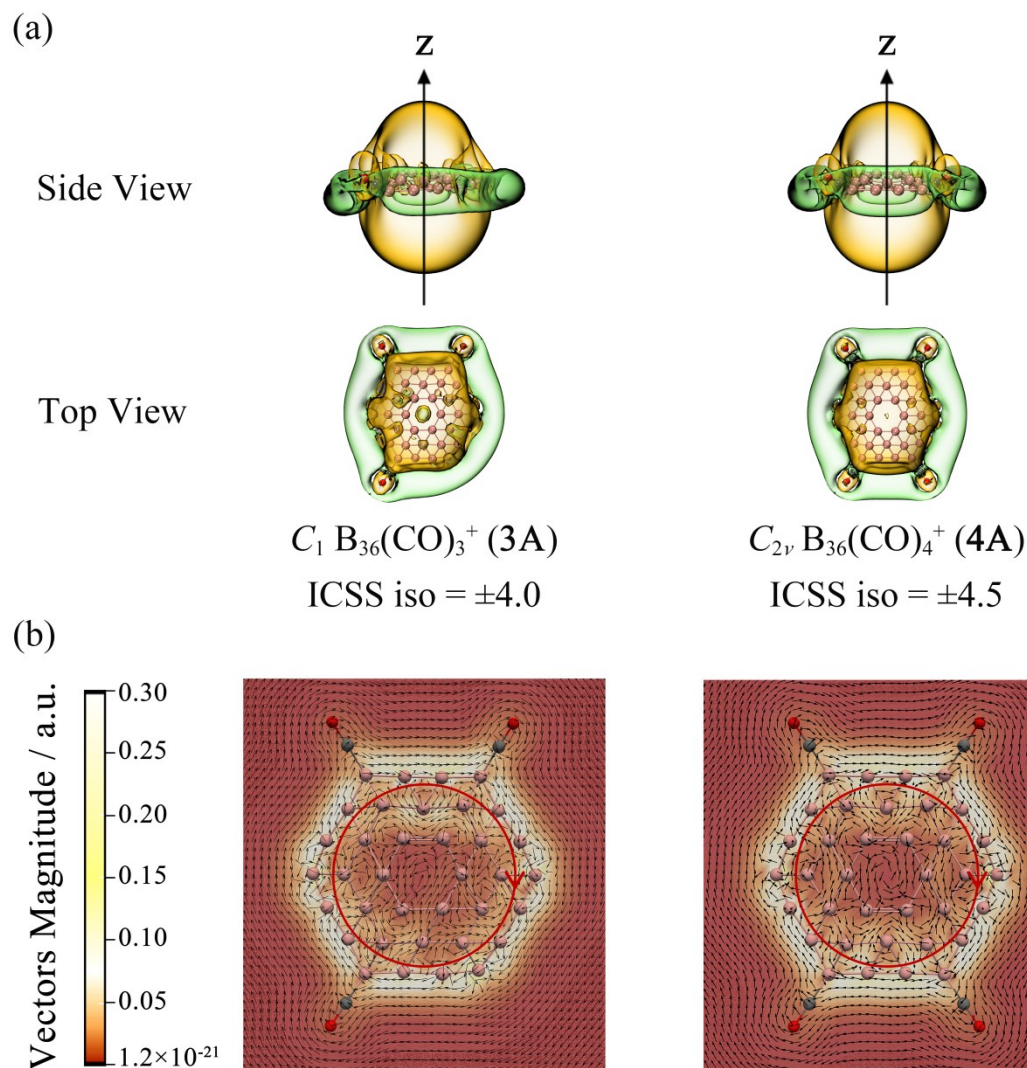

**Fig.S28** (a) Calculated ICSS surfaces of  $C_1 B_{36}(CO)_3^+$  (**3A**),  $C_{2v} B_{36}(CO)_4^+$  (**4A**) at PBE0 level. Yellow and green regions stand for chemical shielding and de-shielding areas, respectively. (b) The corresponding calculated GIMIC plots 1.0 Å above the molecular planes, with the calculated ring current densities indicated in a.u. in the colour scale. The external magnetic field is perpendicular to the molecular plane. The red arrows represent directions of the ring currents on the

GIMIC

iso-surfaces.



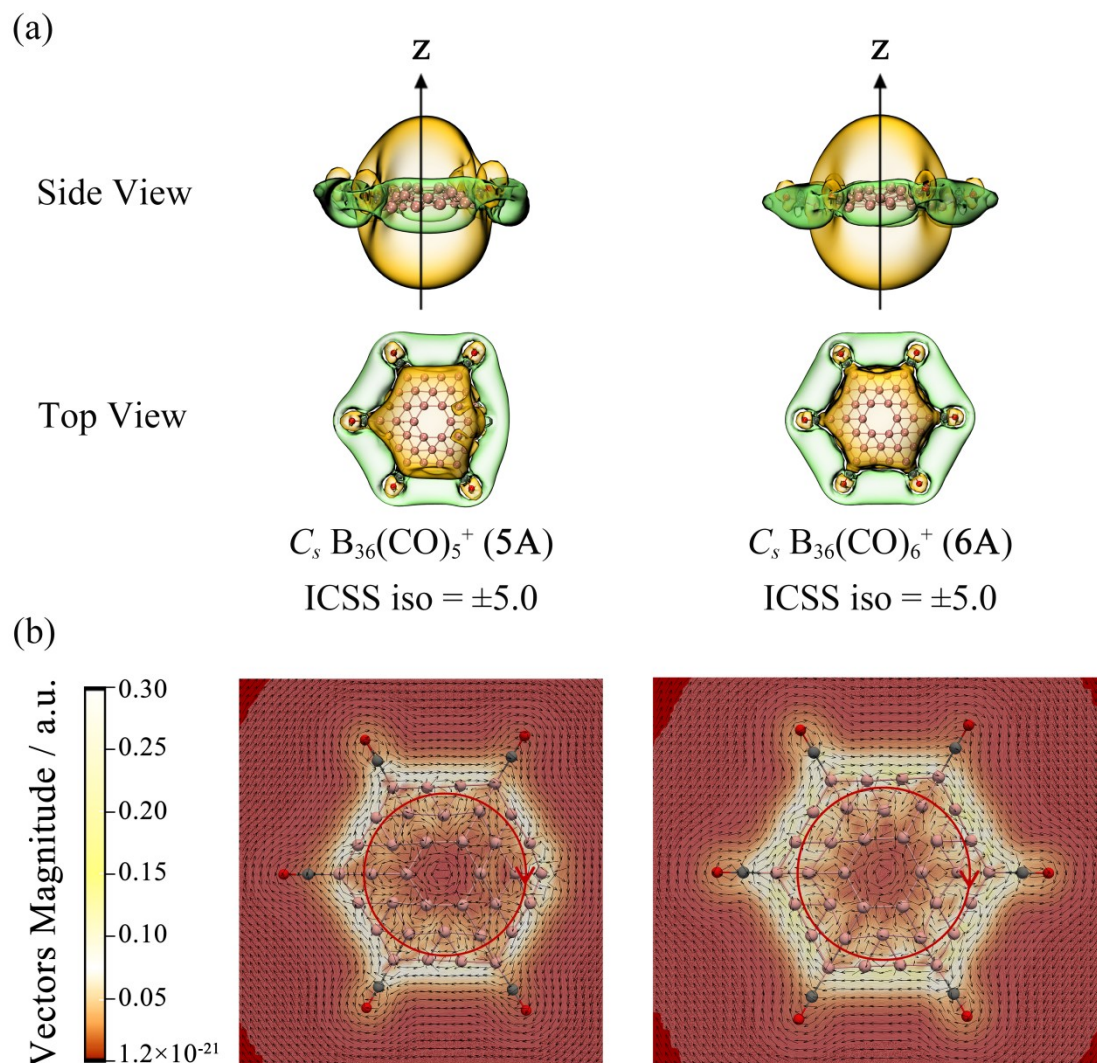

**Fig.S29** (a) Calculated ICSS surfaces of  $C_s B_{36}(CO)_5^+$  (**5A**),  $C_s B_{36}(CO)_6^+$  (**6A**) at PBE0 level. Yellow and green regions stand for chemical shielding and de-shielding areas, respectively. (b) The corresponding calculated GIMIC plots 1.0 Å above the molecular planes, with the calculated ring current densities indicated in a.u. in the colour scale. The external magnetic field is perpendicular to the molecular plane. The red arrows represent directions of the ring currents on the

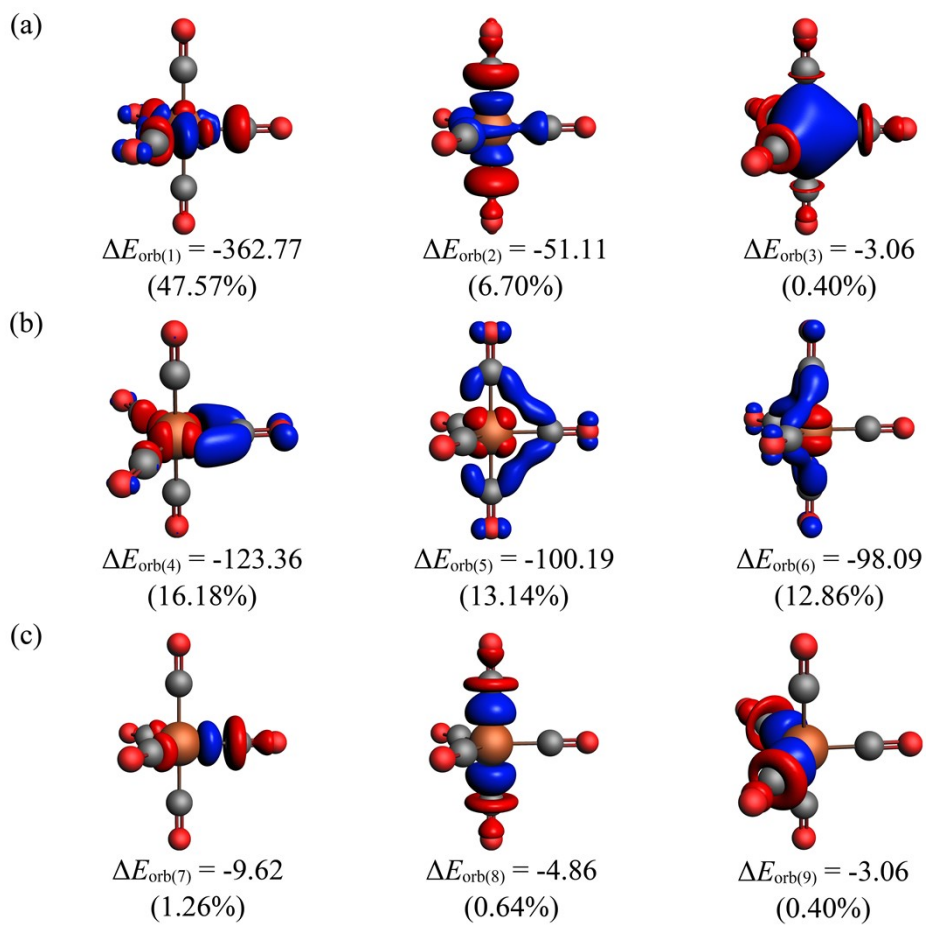

**Fig.S30** Shape of the deformation densities  $\Delta\rho_{(1)-(9)}$ , which are associated with the orbital interaction energies  $\Delta E_{\text{orb}}$  (in kcal mol<sup>-1</sup>) in Fe(CO)<sub>5</sub>. The color code of the charge flow is red to blue.

**Table S1.** EDA-NOCV results for  $\text{B}_{36}(\text{CO})^+$  (**1A**) at the PBE0/TZ2P-ZORA level using PBE0/6-311+G(d) optimized geometries, with CO and  $\text{B}_{36}^+$  designated as the interacting fragments. Energy values are given in kcal/mol.

| Energy term                                       | Assignment                                                                    | Interacting fragment<br>$\text{B}_{36}^+ + \text{CO}$ |
|---------------------------------------------------|-------------------------------------------------------------------------------|-------------------------------------------------------|
| $\Delta E_{\text{int}}$                           |                                                                               | -41.84                                                |
| $\Delta E_{\text{Pauli}}$                         |                                                                               | 248.62                                                |
| $\Delta E_{\text{elstat}}^{[\text{a}]}$           |                                                                               | -117.88 (40.58%)                                      |
| $\Delta E_{\text{orb}}^{[\text{a}]}$              |                                                                               | -172.58 (59.42%)                                      |
| $\Delta E_{\text{orb}}(1)^{[\text{b}]}$           | $[\text{B}_{36}^+(\text{p})] \leftarrow \text{CO } \sigma \text{ donation}$   | -103.06 (59.72%)                                      |
| $\Delta E_{\text{orb}}(2)^{[\text{b}]}$           | $[\text{B}_{36}^+(\text{p})] \rightarrow \text{CO } \pi \text{ backdonation}$ | -32.32 (18.73%)                                       |
| $\Delta E_{\text{orb}}(3)^{[\text{b}]}$           | $[\text{B}_{36}^+(\text{p})] \rightarrow \text{CO } \pi \text{ backdonation}$ | -15.26 (8.84%)                                        |
| $\Delta E_{\text{orb}}(\text{rest})^{[\text{b}]}$ |                                                                               | -21.94 (12.71%)                                       |

[a] The values in parentheses give the percentage contribution to the total attractive interactions  $\Delta E_{\text{elstat}} + \Delta E_{\text{orb}}$ . [b] The values in parentheses give the percentage contribution to the total orbital interactions  $\Delta E_{\text{orb}}$ .



**Table S2.** EDA-NOCV results for B<sub>36</sub>(CO) (**1a**) at the PBE0/TZ2P-ZORA level using PBE0/6-311+G(d) optimized geometries, with CO and B<sub>36</sub> designated as the interacting fragments. Energy values are given in kcal/mol.

| Energy term                                       | Assignment                                | Interacting fragment<br>B <sub>36</sub> + CO |
|---------------------------------------------------|-------------------------------------------|----------------------------------------------|
| $\Delta E_{\text{int}}$                           |                                           | -38.41                                       |
| $\Delta E_{\text{Pauli}}$                         |                                           | 273.20                                       |
| $\Delta E_{\text{elstat}}^{[\text{a}]}$           |                                           | -129.72 (41.63%)                             |
| $\Delta E_{\text{orb}}^{[\text{a}]}$              |                                           | -181.89 (58.37%)                             |
| $\Delta E_{\text{orb}}(1)^{[\text{b}]}$           | [B <sub>36</sub> (p)] ← CO σ donation     | -100.42 (55.21%)                             |
| $\Delta E_{\text{orb}}(2)^{[\text{b}]}$           | [B <sub>36</sub> (p)] → CO π backdonation | -38.67 (21.26%)                              |
| $\Delta E_{\text{orb}}(3)^{[\text{b}]}$           | [B <sub>36</sub> (p)] → CO π backdonation | -16.78 (9.22%)                               |
| $\Delta E_{\text{orb}}(\text{rest})^{[\text{b}]}$ |                                           | -26.02 (14.31%)                              |

[a] The values in parentheses give the percentage contribution to the total attractive interactions  $\Delta E_{\text{elstat}} + \Delta E_{\text{orb}}$ . [b] The values in parentheses give the percentage contribution to the total orbital interactions  $\Delta E_{\text{orb}}$ .

**Table S3.** EDA-NOCV results for singlet  $D_{3h}$  symmetric  $\text{Fe}(\text{CO})_5$  complexes at the PBE0/TZ2P-ZORA level using PBE0/6-311+G(d) optimized geometries. The interacting fragments are the metal atom Fe in the singlet and  $(\text{CO})_5$  in the singlet state. Energy values are given in kcal/mol.

| Energy term                                       | Assignment                                                         | Interacting fragment<br>$\text{B}_{36}^+ + \text{CO}$ |
|---------------------------------------------------|--------------------------------------------------------------------|-------------------------------------------------------|
| $\Delta E_{\text{int}}$                           |                                                                    | -276.38                                               |
| $\Delta E_{\text{Pauli}}$                         |                                                                    | 1035.23                                               |
| $\Delta E_{\text{elstat}}^{[\text{a}]}$           |                                                                    | -548.99 (41.86%)                                      |
| $\Delta E_{\text{orb}}^{[\text{a}]}$              |                                                                    | -762.62 (58.14%)                                      |
| $\Delta E_{\text{orb}}(1)^{[\text{b}]}$           | $[\text{Fe}(\text{p})] \leftarrow (\text{CO})_5 \sigma$ donation   | -362.77 (47.57%)                                      |
| $\Delta E_{\text{orb}}(2)^{[\text{b}]}$           | $[\text{Fe}(\text{p})] \leftarrow (\text{CO})_5 \sigma$ donation   | -51.11 (6.7%)                                         |
| $\Delta E_{\text{orb}}(3)^{[\text{b}]}$           | $[\text{Fe}(\text{s})] \leftarrow (\text{CO})_5 \sigma$ donation   | -3.06 (0.40%)                                         |
| $\Delta E_{\text{orb}}(4)^{[\text{b}]}$           | $[\text{Fe}(\text{d})] \rightarrow (\text{CO})_5 \pi$ backdonation | -123.36 (16.18%)                                      |
| $\Delta E_{\text{orb}}(5)^{[\text{b}]}$           | $[\text{Fe}(\text{d})] \rightarrow (\text{CO})_5 \pi$ backdonation | -100.19 (13.14%)                                      |
| $\Delta E_{\text{orb}}(6)^{[\text{b}]}$           | $[\text{Fe}(\text{d})] \rightarrow (\text{CO})_5 \pi$ backdonation | -98.09 (12.86%)                                       |
| $\Delta E_{\text{orb}}(7)^{[\text{b}]}$           | $(\text{CO})_5$ polarization                                       | -9.62 (1.26%)                                         |
| $\Delta E_{\text{orb}}(8)^{[\text{b}]}$           | $(\text{CO})_5$ polarization                                       | -4.86 (0.64%)                                         |
| $\Delta E_{\text{orb}}(9)^{[\text{b}]}$           | $(\text{CO})_5$ polarization                                       | -3.06 (0.40%)                                         |
| $\Delta E_{\text{orb}}(\text{rest})^{[\text{b}]}$ |                                                                    | -6.50 (0.85%)                                         |

[a] The values in parentheses give the percentage contribution to the total attractive interactions  $\Delta E_{\text{elstat}} + \Delta E_{\text{orb}}$ . [b] The values in parentheses give the percentage contribution to the total orbital interactions  $\Delta E_{\text{orb}}$ .
